# Supplementary material for: Comparison of the two up-to-date sequencing technologies for genome assembly: HiFi reads of Pacific Biosciences Sequel II system and ultralong reads of Oxford Nanopore
Source: PubMed Central journal article supplement (PMC7736813; doi:10.1093/gigascience/giaa123), 2020-12-15

## Comparison of the two up-to-date sequencing technologies for genome assembly: HiFi reads of Pacbio Sequel II system and ultralong reads of Oxford Nanopore --Manuscript Draft--

|                                                      |                                                                                                                                                                                                                                                                                                                                                                                                                                                                                                                                                                                                                                                                                                                                                                                                                                                                                                                                                                                                                                                                                                                                                                                                                                                                                                                                                                                                                                                                                                                                                             |
|------------------------------------------------------|-------------------------------------------------------------------------------------------------------------------------------------------------------------------------------------------------------------------------------------------------------------------------------------------------------------------------------------------------------------------------------------------------------------------------------------------------------------------------------------------------------------------------------------------------------------------------------------------------------------------------------------------------------------------------------------------------------------------------------------------------------------------------------------------------------------------------------------------------------------------------------------------------------------------------------------------------------------------------------------------------------------------------------------------------------------------------------------------------------------------------------------------------------------------------------------------------------------------------------------------------------------------------------------------------------------------------------------------------------------------------------------------------------------------------------------------------------------------------------------------------------------------------------------------------------------|
| <b>Manuscript Number:</b>                            | GIGA-D-20-00061R1                                                                                                                                                                                                                                                                                                                                                                                                                                                                                                                                                                                                                                                                                                                                                                                                                                                                                                                                                                                                                                                                                                                                                                                                                                                                                                                                                                                                                                                                                                                                           |
| <b>Full Title:</b>                                   | Comparison of the two up-to-date sequencing technologies for genome assembly: HiFi reads of Pacbio Sequel II system and ultralong reads of Oxford Nanopore                                                                                                                                                                                                                                                                                                                                                                                                                                                                                                                                                                                                                                                                                                                                                                                                                                                                                                                                                                                                                                                                                                                                                                                                                                                                                                                                                                                                  |
| <b>Article Type:</b>                                 | Technical Note                                                                                                                                                                                                                                                                                                                                                                                                                                                                                                                                                                                                                                                                                                                                                                                                                                                                                                                                                                                                                                                                                                                                                                                                                                                                                                                                                                                                                                                                                                                                              |
| <b>Funding Information:</b>                          |                                                                                                                                                                                                                                                                                                                                                                                                                                                                                                                                                                                                                                                                                                                                                                                                                                                                                                                                                                                                                                                                                                                                                                                                                                                                                                                                                                                                                                                                                                                                                             |
| <b>Abstract:</b>                                     | <p>The availability of reference genomes has revolutionized the study of biology. Multiple competing technologies have been developed to improve the quality and robustness of genome assemblies during the last decade. The two widely-used long-read sequencing providers – Pacbio (PB) and Oxford Nanopore Technologies (ONT) – have recently updated their platforms: PB enables high throughput HiFi reads with base-level resolution with &gt;99% and ONT generated reads as long as 2 Mb. We applied the two up-to-date platforms to one single rice individual and then compared the two assemblies to investigate the advantages and limitations of each. The results showed that ONT ultralong reads delivered higher contiguity producing a total of 18 contigs of which ten were assembled into a single chromosome compared to that of 394 contigs and three chromosome-level contigs for the PB assembly. The ONT ultralong reads also prevented assembly errors caused by long repetitive regions for which we observed a total of 44 genes of false redundancies and ten genes of false losses in the PB assembly leading to over/under-estimation of the gene families in those long repetitive regions. We also noted that the PB HiFi reads generated assemblies with considerably fewer errors at the level of single nucleotide and small InDels than that of the ONT assembly which generated an average 1.06 errors per Kb and finally engendered 1,475 incorrect gene annotations via altered or truncated protein predictions.</p> |
| <b>Corresponding Author:</b>                         | Shanlin Liu                                                                                                                                                                                                                                                                                                                                                                                                                                                                                                                                                                                                                                                                                                                                                                                                                                                                                                                                                                                                                                                                                                                                                                                                                                                                                                                                                                                                                                                                                                                                                 |
| <b>Corresponding Author Secondary Information:</b>   |                                                                                                                                                                                                                                                                                                                                                                                                                                                                                                                                                                                                                                                                                                                                                                                                                                                                                                                                                                                                                                                                                                                                                                                                                                                                                                                                                                                                                                                                                                                                                             |
| <b>Corresponding Author's Institution:</b>           |                                                                                                                                                                                                                                                                                                                                                                                                                                                                                                                                                                                                                                                                                                                                                                                                                                                                                                                                                                                                                                                                                                                                                                                                                                                                                                                                                                                                                                                                                                                                                             |
| <b>Corresponding Author's Secondary Institution:</b> |                                                                                                                                                                                                                                                                                                                                                                                                                                                                                                                                                                                                                                                                                                                                                                                                                                                                                                                                                                                                                                                                                                                                                                                                                                                                                                                                                                                                                                                                                                                                                             |
| <b>First Author:</b>                                 | DanDan Lang                                                                                                                                                                                                                                                                                                                                                                                                                                                                                                                                                                                                                                                                                                                                                                                                                                                                                                                                                                                                                                                                                                                                                                                                                                                                                                                                                                                                                                                                                                                                                 |
| <b>First Author Secondary Information:</b>           |                                                                                                                                                                                                                                                                                                                                                                                                                                                                                                                                                                                                                                                                                                                                                                                                                                                                                                                                                                                                                                                                                                                                                                                                                                                                                                                                                                                                                                                                                                                                                             |
| <b>Order of Authors:</b>                             | <p>DanDan Lang</p> <p>Shilai Zhang</p> <p>Pingping Ren</p> <p>Fan Liang</p> <p>Zongyi Sun</p> <p>Guanliang Meng</p> <p>Yuntao Tan</p> <p>Jiang Hu</p> <p>Xiaokang Li</p> <p>Qihua Lai</p> <p>Lingling Han</p>                                                                                                                                                                                                                                                                                                                                                                                                                                                                                                                                                                                                                                                                                                                                                                                                                                                                                                                                                                                                                                                                                                                                                                                                                                                                                                                                               |

|                                                |                                                                                                                                                                                                                                                                                                                                                                                                                                                                                                                                                                                                                                                                                                                                                                                                                                                                                                                                                                                                                                                                                                                                                                                                                                                                                                                                                                                                                                                                                                                                                                                                                                                                                                                                                                                                                                                                                                                                                                                                                                                                                                                                                                                                                                                                                                                                                                                                                                                                                                                                                                                                                                                                                                                                                                                                                                                                                                                                                                                                                                                                                                                                                                                                                                                                                                                                                                                                                                                                                                                                   |
|------------------------------------------------|-----------------------------------------------------------------------------------------------------------------------------------------------------------------------------------------------------------------------------------------------------------------------------------------------------------------------------------------------------------------------------------------------------------------------------------------------------------------------------------------------------------------------------------------------------------------------------------------------------------------------------------------------------------------------------------------------------------------------------------------------------------------------------------------------------------------------------------------------------------------------------------------------------------------------------------------------------------------------------------------------------------------------------------------------------------------------------------------------------------------------------------------------------------------------------------------------------------------------------------------------------------------------------------------------------------------------------------------------------------------------------------------------------------------------------------------------------------------------------------------------------------------------------------------------------------------------------------------------------------------------------------------------------------------------------------------------------------------------------------------------------------------------------------------------------------------------------------------------------------------------------------------------------------------------------------------------------------------------------------------------------------------------------------------------------------------------------------------------------------------------------------------------------------------------------------------------------------------------------------------------------------------------------------------------------------------------------------------------------------------------------------------------------------------------------------------------------------------------------------------------------------------------------------------------------------------------------------------------------------------------------------------------------------------------------------------------------------------------------------------------------------------------------------------------------------------------------------------------------------------------------------------------------------------------------------------------------------------------------------------------------------------------------------------------------------------------------------------------------------------------------------------------------------------------------------------------------------------------------------------------------------------------------------------------------------------------------------------------------------------------------------------------------------------------------------------------------------------------------------------------------------------------------------|
|                                                | Depeng Wang                                                                                                                                                                                                                                                                                                                                                                                                                                                                                                                                                                                                                                                                                                                                                                                                                                                                                                                                                                                                                                                                                                                                                                                                                                                                                                                                                                                                                                                                                                                                                                                                                                                                                                                                                                                                                                                                                                                                                                                                                                                                                                                                                                                                                                                                                                                                                                                                                                                                                                                                                                                                                                                                                                                                                                                                                                                                                                                                                                                                                                                                                                                                                                                                                                                                                                                                                                                                                                                                                                                       |
|                                                | Fengyi Hu                                                                                                                                                                                                                                                                                                                                                                                                                                                                                                                                                                                                                                                                                                                                                                                                                                                                                                                                                                                                                                                                                                                                                                                                                                                                                                                                                                                                                                                                                                                                                                                                                                                                                                                                                                                                                                                                                                                                                                                                                                                                                                                                                                                                                                                                                                                                                                                                                                                                                                                                                                                                                                                                                                                                                                                                                                                                                                                                                                                                                                                                                                                                                                                                                                                                                                                                                                                                                                                                                                                         |
|                                                | Wen Wang                                                                                                                                                                                                                                                                                                                                                                                                                                                                                                                                                                                                                                                                                                                                                                                                                                                                                                                                                                                                                                                                                                                                                                                                                                                                                                                                                                                                                                                                                                                                                                                                                                                                                                                                                                                                                                                                                                                                                                                                                                                                                                                                                                                                                                                                                                                                                                                                                                                                                                                                                                                                                                                                                                                                                                                                                                                                                                                                                                                                                                                                                                                                                                                                                                                                                                                                                                                                                                                                                                                          |
|                                                | Shanlin Liu                                                                                                                                                                                                                                                                                                                                                                                                                                                                                                                                                                                                                                                                                                                                                                                                                                                                                                                                                                                                                                                                                                                                                                                                                                                                                                                                                                                                                                                                                                                                                                                                                                                                                                                                                                                                                                                                                                                                                                                                                                                                                                                                                                                                                                                                                                                                                                                                                                                                                                                                                                                                                                                                                                                                                                                                                                                                                                                                                                                                                                                                                                                                                                                                                                                                                                                                                                                                                                                                                                                       |
| <b>Order of Authors Secondary Information:</b> |                                                                                                                                                                                                                                                                                                                                                                                                                                                                                                                                                                                                                                                                                                                                                                                                                                                                                                                                                                                                                                                                                                                                                                                                                                                                                                                                                                                                                                                                                                                                                                                                                                                                                                                                                                                                                                                                                                                                                                                                                                                                                                                                                                                                                                                                                                                                                                                                                                                                                                                                                                                                                                                                                                                                                                                                                                                                                                                                                                                                                                                                                                                                                                                                                                                                                                                                                                                                                                                                                                                                   |
| <b>Response to Reviewers:</b>                  | <p>Journal: GigaScience<br/> Manuscript ID: GIGA-D-20-00061<br/> Title: " Comparison of the two up-to-date sequencing technologies for genome assembly: HiFi reads of Pacbio Sequel II system and ultralong reads of Oxford Nanopore"<br/> Author(s): DanDan Lang; Shilai Zhang; Pingping Ren; Fan Liang; Zongyi Sun; Guanliang Meng; Yuntao Tan; Jiang Hu; Xiaokang Li; Qihua Lai; Lingling Han; Depeng Wang; Fengyi Hu; Wen Wang; Shanlin Liu</p> <p>Dear Dr. Hans Zauner,<br/> We are very grateful to both the reviewers and the editor for the critical comments and constructive suggestions, which have helped improve our paper considerably. Below we provide our responses to the reviewers' comments in blue. We have incorporated most of the suggested changes as well as additional analyses. The manuscript has now gone through required revision and reorganization, and we sincerely hope that this revision is satisfactory to the reviewers</p> <p>Reviewer #1: This manuscript compares the results of genome assemblies from the data of two long-reads sequencing technologies and multiple genome assemblers. It focuses on analyzing the impact of the sequence qualities (read lengths and accuracies) to the contiguity and the accuracy of the assembled contigs.</p> <p>While the results agree with the general understanding of how the read lengths and the basecall accuracies affect the final assembly quality, I found the detailed examples comparing the two picked assemblies are interesting. It provides useful insight for understanding the impact of repeats for genome assembly results for researchers. The manuscript is well written and easy to follow to get the points across. Here are a couple points that I hope the authors will be able to address:</p> <p>(1) While the rice strain is documented in the manuscript, it will be useful to comment on the polyploidy of this particular strain? The BUSCO results seem to indicate it is a haploid strain, and the readers may be able to check it out from the strain ID. However, the authors should comment on the polyploid to help the readers. It is important to understand how to interpret results according to the known polyploidy.</p> <p>&gt; The rice individual (<i>Oryza sativa</i>) we used in this study is the indica cultivar 9311, which is a diploid strain. We noted it at line 70.</p> <p>(2) In the paragraph starting with "Following DNA extraction", please refer to the supplementary material about the extraction protocol there.</p> <p>&gt; To conform to the journal style, we moved part of the supplementary methods to the main text, which should have solved this problem. Thank you for pointing it out.</p> <p>(3) The authors should comment on the time used for sequencing on PromethION and Sequel II, and the computation resources (CPU/wall clock time, memory, cluster setup, etc.) needed for each assembler.</p> <p>&gt; It is a good suggestion. We included it at Table S1 in the resubmitted version.</p> <p>(4) The IGV view of the ONT reads mapped the PacBio assembly GAP does not show the disagreement of the ONT reads to the ONT contigs. While the high error rates may make it messy to see. If such a view is hard to see, it is still useful to examine if there is some systematic disagreement between the reads and the contigs. I am hoping the authors can comment on whether some systematic errors are visible. Also, will it provide useful</p> |

insight if we compare it to PacBio Reads mapping to the ONT contigs?

> The IGV plot aims to demonstrate the GAPS of the PB HiFi assembly can be spanned by several ONT ultra-long reads, and thus explained the reason why such gaps can be assembled using ultra-long reads. Zoom in the IGV plot may show the systematic errors. However, it will as well dismiss our main purpose. Therefore, we would keep it as its current view.

(5) When the authors refer to "string graph," it needs a citation. The term the "string graph" is coined by Gene Meyer for a specific way to construct a graph for genome assembly. Not all assemblers use the same graph construction. The authors should use "assembly graphs" and cite related papers.

>We added the corresponding citation, and algorithms of the software referred to here is based on string graph, so we kept the term "string graph".

(6) Related to the polyploidy of the strain, the author mentioned "diploid heterozygous states," there is no citation or explanation to help the readers to know what the authors refer to.

>As assembly obtains one single suite of a diploid genome, only one state of those heterozygous sites presents in the assembly results. The differences between the ONT and the PB assembly could be the real conditions in the individual we sequenced. We clarify it at lines 230-231.

(7) The authors mention the errors in ONT assembly are clustered. The authors' explanation is because of low coverage mapping in the polish steps. Are these clusters caused by repeat contents, low accuracy of ONT assembly on particular sequencing contexts? In the caption of Figure S5, the authors write: "the distances should have a peak around 1,000 bp for an average error rate of 1.06 per kb in the case of random distribution." The author should put a theoretical curve or a simulated one on the same plot to show the distribution of a random error model does generate a different distribution.

>Thank you for the suggestion. Reviewer #2 also proposed a similar suggestion. We further investigated the genomic characteristics in and flanking those error regions. It showed that those error-enriched regions were characterized with higher methylation level compared to the other genome regions, and we added it at lines 146-150. We also added a theoretical curve on Figure S6 (Figure S5 in the last version) to better illustrate our point of view. Thanks for this constructive suggestion.

Reviewer #2: In the manuscript entitled, "Comparison of the two up-to-date sequencing technologies for genome assembly: HiFi reads of PacBio Sequel II and ultralong reads of Oxford Nanopore," Lang et al., generate assemblies for a rice variety (9311) using the two different long read sequencing technologies and then compare contiguity and accuracy statistics. The authors conclude that Oxford Nanopore Technologies (ONT) sequencing provides superior contiguity, while Pacific Bioscience (PacBio) provides superior base quality accuracy, and that the two platforms should be leveraged together for reference quality genomes. Overall the manuscript is very concise and well developed. However, there are a couple points that the authors should acknowledge and discuss, which impact the interpretation of their results.

First off, the BioProject PRJNA600693 was not available to assess the assemblies or the raw data. In a manuscript that compares genomes, validating some of the claims is essential, and the data should be available to the reviewer.

>Thank for pointing it out. It is assessable now. In addition, to follow the rule of GigaScience, we have already uploaded the two assembly files, two annotation files, two complete BUSCO output files, two CDS sequence files, two protein translation files and alignment results to the GigaDB server in the process of our first submission. It should be available to reviewers. The access info is as follows:

username = user30  
password = LiuSComparison

FTP server = parrot.genomics.cn

The authors set up a very nice and simple contrast between PacBio HiFi and ONT. There are some significant differences between the datasets that should be discussed though. The read N50 length of the two platforms is considerably different at 41 kb vs. 13 kb for ONT and PacBio respectively. Moreover the absolute coverage is significantly different between ONT and PacBio at 92 Gb (230x) vs. 253 Gb (632x) respectively, even though the reported HiFi coverage is only 50X. There are several opportunities here. First, the authors should at the very least mention these differences, which at face value explain ONT being more contiguous and PacBio having higher base quality. Second, since the authors have an extraordinary amount of data for this rice line, it would be also interesting to see where the quality or contiguity starts to decrease as a function of the amount or type of data.

>Good point. We clarified the coverage differences between the two platforms in the resubmitted version at lines 77-81. We also subsampled the raw reads to investigate the influence of data size on genome assembly, please find it at lines 127-130 and in Table S6 and Figure S4.

The section about the nucleotide variation is a little confusing. It is stated that the regions (~94%) that showed low base quality in the ONT assembly also had low shotgun read coverage. Was this ONT, PacBio or Illumina coverage that was low? With the amount of coverage that was generated for each platform (ONT, 230x; PacBio, 632x; Illumina 70x) why would there be regions in the assembly with less than 5x coverage. This needs to be clearer. In the same section, SNPs and INDELS are referred to as small-scale mis-assemblies; more accurately these are sequence errors not mis-assemblies. Did the authors use the ONT or PacBio data to look at DNA methylation? If the errors are clustering in the genome then maybe the errors in the ONT sequence are the result of mis-called bases that are highly methylated. Since the data is available this would be an important point to make or reason to rule out.

>It is a very good point regarding to the abnormal coverage issues. Firstly, we clarify that the low coverage refers to the shotgun reads generated using MGI-SEQ platform. Then, we added possible reasons that deterred the correct mapping of short reads for those regions, please find them at lines 146-156.

For the word "mis-assembly", we agree that those SNVs and InDels should come from sequence errors. We clarified it at line 140.

It is a good suggestion as for the DNA methylation analysis. We investigated the correlation between methylation profiles and those error-enriched regions. It showed that the GC content and methylation level of those error-enriched regions are significantly higher than that of other genome regions. We included it at lines 150-156 and Figure S8.

PacBio can also run in long read mode, so researchers could mix HiFi with longreads on one platform. This would be good to also mention.

>Added, at lines 128-132.

The BUSCO scores for the two genomes are almost identical. It would be good to add a bit of commentary why you see similar BUSCO scores but some differences in protein content. This will help the reader understand the differences and limitations of each measure.

>Thank you. We included the explanation at lines 153-156.

While mentioning exact costs for both methods would not stand the test of time it would be good for the reader to understand the relative cost differences between the two approaches.

>Since the yield of both the platforms (especially the ONT) varies a lot between different species. For example, some human DNA samples can generate > 100 Gb data using one PromethION cell, but some marine or insect species can only generate < 20 Gb data per cell. As a result, we don't think cost of the current work (both platforms have spent around \$4,000 for sequencing) reflects a real cost difference for

other species. It would be better for the readers to consult their local dealers for the cost details.

Minor points:

What species of rice is 9311? The authors should use the scientific name somewhere in the manuscript to clarify what species is "rice."

>We corrected it as "one rice individual (*Oryza sativa indica*,  $2n = 2x = 24$ , variety 9311)" at line 69.

Grammar:

The first sentence of the Main Text. Diseases don't find causative alleles. Maybe, "The human reference genome enabled the identification of disease causative alleles...."

Sentence 4 page 3: species don't leverage cutting edge sequencing. "The two cutting edge sequencing technologies has enabled the sequencing of many species..."

Bottom page 4 "It was gone through by multiple ONT long reads..." It was spanned by....

>Thank you for noticing those errors. We have them corrected accordingly.

Reviewer #3: Advances in sequencing technologies provide us with an unprecedented opportunity for high-quality de novo reconstruction of complex eukaryotic genomes. The manuscript presents the comparative analysis of the two assemblies of a rice genome, obtained with ultra-long ONT and Pacbio HiFi sequencing.

First, while a combination of HiFi and ultra-long ONT datasets is available for several human genomes (and maybe some other organisms), the scope of the study is limited to a single organism with a relatively small and simple genome. Moreover, only a single genome has been considered with a single dataset for each technology. In particular, while longer Pacbio HiFi libraries with reads reaching 20Kb are now not uncommon the dataset considered in the study had an average read length less than 12Kb.

>Firstly, human genome, as well as model species, could be special cases. For instance, scientists who work in the field of human health could account for more than half of the entire academic world. They depend heavily on one single genome reference and have been spending tremendous time and money to achieve high-quality genome references, and thus combined as many cutting-edge technologies as possible. However, the vast majority of scientists who study non-model species obtained the genome references of targeted species using only one single sequencing tech, either PB or ONT, due to limited funding. The current work provides scientists valuable information on the pros and cons of PB HiFi and ONT ultra-long, and thus help them decide which one fits their project better, and they can as well learn the disadvantages of their choices in advance, as a results, be cautious to any related conclusions.

>For the library size, more and more studies begin to build long CCS libraries (15 kb – 20 kb) nowadays. We started this work right after the launching of PB sequel II. 10 kb library was recommended to guarantee high accuracy level for each CCS read at that time. We have an average HiFi read length of 13.36 kb, instead of what you mentioned: less than 12 kb which is the average length of subreads. We removed this confusing statement in the main text. In addition, we also added a note in the manuscript clarify this problem saying that "It is also worth noting that PB can run in long read mode, which, although can hardly generate reads as long as the ONT ultralong reads, can aid in connecting some of the gaps caused by long repeats. Besides, longer PB libraries with HiFi reads reaching 20 kb would be conducive to assembly contiguity as well".

Further I will focus on major issues of the presented analysis and mention some of the minor ones in the end.

Major issues

The 'primary' ONT assembly used was produced by a software tool for which I was not able to find neither publication/white-paper, nor a comprehensive benchmark. Moreover its github page states "In addition, we found that NextDenovo, of the current version, might produce a small number of unexpected connection errors in the highly repetitive regions, which, however, can be easily corrected using additional Hi-C or Bionano data. We are still in a progress of optimizing NextDenovo and will continuously update it, especially in terms of assembly accuracy". Since the only criteria used to choose the 'optimal' assembly between different assembly tools was based on their N50 values, it immediately raises questions about the reliability of the results! The only confirmation of assembly accuracy given is the dotplot against the reference genome. Unfortunately at the presented resolution (of both the figure and the analysis itself) it fails to convince the reader of the structural accuracy of the assembly. Also the discrepancy between N50 values of different ONT assemblies looks staggering and raises suspicion. I would suggest to include stats for some other well established long-read assemblers (e.g. Flye and Shasta), which will hopefully be able to produce assembly with continuity comparable to NextDenovo and dispel the suspicion. As a side note, somehow the main text never states which assemblies were used for the most part of the analysis.

>NextDenovo is publicly available and free for downloading on Github. Up to the time we drafted this response letter, it has more than 2,000 downloads and eight releases (we used version 2.0 for this manuscript and the latest release is version 2.2). It is weird that the reviewer argued about the reliability of its assembly results because it generated a much better results compared to the other software. It is worth noting that its readme text on github states that it performs well especially for ONT ultra-long reads. It means the software developed algorithms to take advantage of ultra-long reads, just like HiCanu designed its algorithms to fit HiFi reads. In addition, HiCanu also showed ca. 10 times higher N50 compared to the other two software. The discrepancy between HiCanu and the other two software for HiFi reads is almost the same to that of NextDenovo for the ONT ultra-long reads (10.38 vs 10.29). As both HiCanu and NextDenovo are publicly available on Github and both have not been certified by peer review, we believe this comment reflect the reviewer's personal preference.

>Although we think that this comment has more to do with the reviewer's preference than the actual merit of the manuscript, we added multiple genome assembly results using three more software, FLYE, SHASTA and NECAT, to avoid the staggering N50 differences. In addition to the collinearity analysis for large-scale assembly errors, and SNP and InDels analysis for small-scale assembly errors, we further examined the median size discrepancies between ONT and PB assembly to credit the accuracy of this ONT assembly. We included the results at lines 160-164.

One of the most surprising points of the analysis is that the authors insist on interpreting 'redundancies' as 'misassemblies', which is not a common practice in the assembly benchmarking. While it is important to highlight that while dealing with diploid genomes one can expect to get higher redundancy from HiFi-based assemblies, which should hardly be considered an error as long as they truly represent one of the haplotypes. Besides heterozygous differences, another potential source of redundancies can come from the fact that most long-read assemblers produce overlapping contigs, so the higher the number of fragments the higher will be 'redundancy' from those overlaps. Overall, I don't think that any types of redundancies should be considered as a serious problem at the assembly side. If needed, both types of common redundancies described above can be more-or-less straightforwardly removed post assembly (e.g. purge\_dups software), but most importantly they stem primarily from particular algorithm implementation rather than show a deficiency of a data type. For example I would expect Flye's assembly of HiFi data to get much lower redundancy values due to more aggressive settings toward masking heterozygous differences and output of 'bluntified' contigs. Last but not least, from the methodological point of view, while I'm still uncertain how 'redundant' regions were annotated, they have been certainly detected against the draft ONT assembly, which could contain 'collapsed' tandem repeats and other issues, potentially inflating the stats.



>Objection. We defined those redundancies as mis-assemblies as we intended to assemble one suite of the diploid genome. Practically, the assemblies can be chimeric of the two haploids, rather than containing both haploids in one single assembly file. Most of the current analysis tools are designed to make use of such a genome reference, especially in the field of comparative genomics, which is as well the reason why some software (e.g. `purge_dups` as you mentioned) are developed to remove those redundancies. For instance, those redundancies could lead to incorrect deductions and conclusions in the analysis for gene expansion and contraction.

>It is worth noting that, instead of generating a perfect genome assembly, we aimed to report our observations objectively based on typical genome assembly pipelines for each sequencing platform, from which the readers can easily find out the advantages and disadvantages of both sequencing platforms and then decide what following analyses should be performed to improve their work. The software developers can also learn directly from the results to improve the corresponding assembly algorithms to avoid those unwanted mis-assemblies.

>The reviewer suggested ONT assemblies could contain 'collapsed' repeats and other issues, so could inflated our estimation. First of all, this argument is intuitive and groundless. Secondly, we defined those redundancies very careful, as what we mentioned in our manuscript, we checked the depths of those potential redundancies and classed them as redundancies only in the case that a total depth < 60X and depth of each < 40X. In addition, we also manually checked several corresponding regions on the ONT assembly to make sure they are spanned by single long read.

Significant part of the main text focuses on the analysis of a handful of particular cases of contig 'breaks' in HiFi assembly. First, the choice of 3 gaps taken for deeper analysis (corresponding to chr6) is not explained and, considering how few of them are described, it is unclear how well they represent the general situation. Second, at least some of the analysis is questionable. For one of the gaps the manuscript states that "... the overlapping and the gap regions represented two elements of 15 kb and 48 kb in length that, although have only one copy on Chr. 6, can find their duplications on Chr. 5 (Figure S3). Repetitive elements with such lengths go beyond the typical length generated by PB CCS, therefore the right path can hardly be disentangled from complicated string graphs." At the same time on Figure S3 the sequence identity for instances of both repeats is reported below 98.5%! Repeat instances of such a high sequence divergence are extremely unlikely to affect HiCanu results, so there must be some other reason for fragmentation of this region.

I would recommend exploring the mapping of the HiFi reads onto the hypothesized genomic sequence, since it has been recently observed that HiFi reads can exhibit depletion of coverage in the GA-rich microsatellite regions of the genome. Besides being responsible for some of the observed gaps in this particular assembly, deeper investigation of this topic could have a serious impact on the choice of technology for certain assembly projects.

>Firstly, the scaffold for comparison was randomly selected and we added it in our manuscript to avoid confusion. Secondly, the three breaks showed in the manuscript are the entire set of breaks possessed in the selected assembly scaffolds for comparison, rather than that we chose the three. We would like to emphasize that we conducted the comparison analysis without any deliberate purpose to take side in any sequencing platform.

>For the sequence identity issues, we reported the average similarity score for the entire repeat regions (IDY of about 98.5%) between ONT assembly and PB assembly. The local similarity score can be up to 100% for regions > 10 kb. We believe those local high similarity regions are to blame for generating those gaps and redundancies. We included the local similarity scores on Figure S3 to avoid confusion.

As a final major note I would like to highlight that the data used in the study doesn't seem to be available yet (query of the PRJNA600693 id doesn't return any results on

NCBI web site). TODO review was hampered by this.

>Thank you for your reminding. It is accessible now. Please find details in our response to Reviewer #2.

Minor issues.

If I understood correctly, the coverage of HiFi data exceeded 500x (253 Gb of data for a roughly 400Mb genome). Since it far exceeds the typical coverage of sequencing projects that most assemblers (e.g. HiCanu) are tuned to, I would suggest to subsample HiFi data or use HiCanu 2.0 (which would perform subsampling automatically) for processing a dataset of such coverage depth.

>We fed Canu self-corrected CCS HiFi reads which has a genome coverage of ca. 50X.

The authors note that "the errors of HiFi reads may be enriched in sequences with particular characteristics, rather than completely random ... which may exacerbate the above error statistics for the ONT assembly", suggesting that the rate of the indels in polished ONT assemblies can be noticeably overestimated. I doubt that it is the case though. While the same properties of individual HiFi reads have also been recently observed by other investigators, to the best of my knowledge the consensus quality still tends to be very high. At the same time, the authors can make a much stronger claim by straightforwardly estimating the rate of 'false positive' errors detected within the regions of high coverage of unambiguously mapped Illumina reads.

>Firstly, we did NOT make any strong claims here, we said "may exacerbate the above error statistics for the ONT assembly" instead of what you mentioned "suggesting that the rate of the indels in polished ONT assemblies can be noticeably overestimated". Secondly, we observed those disagreements between ONT assembly and HiFi assembly, and as what we stated in the manuscript, we also reckon that HiFi reads are of high quality, so we deemed those disagreements (SNPs and InDels) as errors of the ONT assembly. However, as Figure S10 showed, Illumina shotgun reads supported ONT assembly for some those differences and we carefully investigated the subreads of each CCS reads and found out that many subreads also supported the ONT assembly. Such information provided by subreads, however, lost during the CCS process. As it is impossible for us to manually check all such cases, we made a statement that "may exacerbate the above error statistics for the ONT assembly".

The statement "PB assembly contained more gaps in each chromosome compared to that of ONT" can not be correct, since before that authors say that there were 3 chromosomes fully assembled from HiFi data.

>Corrected.

I would suggest against direct attempts at polishing HiFi assemblies with Racon, since it might result in corrupting the correctly assembled sequence within repetitive regions.

>Racon can correct lots of InDel errors for the HiFi assembly. As a result, we decide to kept it and added a note to remind readers of such an issue in Figure S11.

Conclusion.

Expectedly, while less than 60 genes were affected by identified assembly problems in HiFi assembly (most by redundancies, which as I mentioned before for the most part are easy to mitigate), even after polishing with Illumina reads > 1000 genes were affected by indels in the reported ONT assembly. Setting aside all the above mentioned issues, the results suggest the conclusion that ultra-long ONT could work well for scaffolding HiFi-based assemblies in order to produce almost-perfect genomic reconstruction of inbred rice varieties.

Overall, the presented manuscript falls short of providing the comprehensive comparison of the two technologies for sequence assembly (which a reader expects from its title), but works as a case study of how their combination should be able to provide an almost perfect medium-complexity genome of low-heterozygosity.



|                                                                                                                                                                                                                                                                                                                                                                                                                                                                                                      |                                                                                                                                                                                                                                                                                                                                                                                                                                                                                                                                                                                                                                                                                                                                                                                                                                                                                                                                                                                                                                                                                                                                            |
|------------------------------------------------------------------------------------------------------------------------------------------------------------------------------------------------------------------------------------------------------------------------------------------------------------------------------------------------------------------------------------------------------------------------------------------------------------------------------------------------------|--------------------------------------------------------------------------------------------------------------------------------------------------------------------------------------------------------------------------------------------------------------------------------------------------------------------------------------------------------------------------------------------------------------------------------------------------------------------------------------------------------------------------------------------------------------------------------------------------------------------------------------------------------------------------------------------------------------------------------------------------------------------------------------------------------------------------------------------------------------------------------------------------------------------------------------------------------------------------------------------------------------------------------------------------------------------------------------------------------------------------------------------|
|                                                                                                                                                                                                                                                                                                                                                                                                                                                                                                      | <p>&gt;As what we replied above, instead of achieving a conclusion of which platform is better and how to obtain a perfect genome assembly, we aimed to report the assembly differences between the two recently released sequencing techniques and provided a reference for those scientists who aim to generate genome references using one of these two sequencing techniques or both. Given the fact that other reviewers found our manuscript to be clear and easy to follow, this comment also seems to reflect the reviewer's personal preference. We did suggest that genome assembly work should leverage both platforms in the next-to-last sentence of our manuscript. However, the reviewer should not draw such a conclusion based on this single sentence, as all the above results talked about comparisons between the two assemblies.</p> <p>Last but not least I found some parts of the manuscript quite poorly written. Additional rounds of revisions are highly recommended before resubmission.</p> <p>&gt;Thank you for your suggestion. We carefully checked the English writing thorough out the manuscript.</p> |
| <b>Additional Information:</b>                                                                                                                                                                                                                                                                                                                                                                                                                                                                       |                                                                                                                                                                                                                                                                                                                                                                                                                                                                                                                                                                                                                                                                                                                                                                                                                                                                                                                                                                                                                                                                                                                                            |
| <b>Question</b>                                                                                                                                                                                                                                                                                                                                                                                                                                                                                      | <b>Response</b>                                                                                                                                                                                                                                                                                                                                                                                                                                                                                                                                                                                                                                                                                                                                                                                                                                                                                                                                                                                                                                                                                                                            |
| Are you submitting this manuscript to a special series or article collection?                                                                                                                                                                                                                                                                                                                                                                                                                        | No                                                                                                                                                                                                                                                                                                                                                                                                                                                                                                                                                                                                                                                                                                                                                                                                                                                                                                                                                                                                                                                                                                                                         |
| <p><b>Experimental design and statistics</b></p> <p>Full details of the experimental design and statistical methods used should be given in the Methods section, as detailed in our <a href="#">Minimum Standards Reporting Checklist</a>. Information essential to interpreting the data presented should be made available in the figure legends.</p> <p>Have you included all the information requested in your manuscript?</p>                                                                   | Yes                                                                                                                                                                                                                                                                                                                                                                                                                                                                                                                                                                                                                                                                                                                                                                                                                                                                                                                                                                                                                                                                                                                                        |
| <p><b>Resources</b></p> <p>A description of all resources used, including antibodies, cell lines, animals and software tools, with enough information to allow them to be uniquely identified, should be included in the Methods section. Authors are strongly encouraged to cite <a href="#">Research Resource Identifiers</a> (RRIDs) for antibodies, model organisms and tools, where possible.</p> <p>Have you included the information requested as detailed in our <a href="#">Minimum</a></p> | Yes                                                                                                                                                                                                                                                                                                                                                                                                                                                                                                                                                                                                                                                                                                                                                                                                                                                                                                                                                                                                                                                                                                                                        |

|                                                                                                                                                                                                                                                                                                                                                                                                                                                                                                                                                         |     |
|---------------------------------------------------------------------------------------------------------------------------------------------------------------------------------------------------------------------------------------------------------------------------------------------------------------------------------------------------------------------------------------------------------------------------------------------------------------------------------------------------------------------------------------------------------|-----|
| <a href="#">Standards Reporting Checklist?</a>                                                                                                                                                                                                                                                                                                                                                                                                                                                                                                          |     |
| <p><b>Availability of data and materials</b></p> <p>All datasets and code on which the conclusions of the paper rely must be either included in your submission or deposited in <a href="#">publicly available repositories</a> (where available and ethically appropriate), referencing such data using a unique identifier in the references and in the “Availability of Data and Materials” section of your manuscript.</p> <p>Have you have met the above requirement as detailed in our <a href="#">Minimum Standards Reporting Checklist?</a></p> | Yes |

1 **Comparison of the two up-to-date sequencing technologies for genome assembly:**  
2 **HiFi reads of Pacbio Sequel II system and ultralong reads of Oxford Nanopore**

3

4 Dandan Lang<sup>1#</sup>, Shilai Zhang<sup>2#</sup>, Pingping Ren<sup>1</sup>, Fan Liang<sup>1</sup>, Zongyi Sun<sup>1</sup>, Guanliang Meng<sup>1</sup>, Yuntao Tan<sup>1</sup>, Jiang Hu<sup>1</sup>,  
5 Xiaokang Li, Qihua Lai, Lingling Han<sup>1</sup>, Depeng Wang<sup>1</sup>, Fengyi Hu<sup>2</sup>, Wen Wang<sup>3,4\*</sup>, Shanlin Liu<sup>1,5\*</sup>

6

7 1. GrandOmic Biosciences, Beijing, 102200, China

8 2. State Key laboratory for Conservation and Utilization of Bio-Resources in Yunnan, Research Center for  
9 Perennial Rice Engineering and Technology of Yunnan, School of Agriculture, Yunnan University, Kunming,  
10 Yunnan, 650091, China

11 3. State Key Laboratory of Genetic Resources and Evolution, Kunming Institute of Zoology, Chinese Academy  
12 of Sciences, 650223 Kunming, Yunnan, China.

13 4. Center for Ecological and Environmental Sciences, Key Laboratory for Space Bioscience & Biotechnology,  
14 Northwestern Polytechnical University, 710072 Xi'an, China.

15 5. Department of Entomology, College of Plant Protection, China Agricultural University, 100193 Beijing, China

16 #Contribute equally

17 \*Correspondence to Shanlin Liu: [liushanlin@grandomics.com](mailto:liushanlin@grandomics.com) & Wen Wang: [wwang@mail.kiz.ac.cn](mailto:wwang@mail.kiz.ac.cn)

18

19

20

21 **Abstract**

22

23 The availability of reference genomes has revolutionized the study of biology. Multiple  
24 competing technologies have been developed to improve the quality and robustness of  
25 genome assemblies during the last decade. The two widely-used long-read sequencing  
26 providers – Pacbio (PB) and Oxford Nanopore Technologies (ONT) – have recently  
27 updated their platforms: PB enables high throughput HiFi reads with base-level  
28 resolution with > 99% and ONT generated reads as long as 2 Mb. We applied the two  
29 up-to-date platforms to one single rice individual and then compared the two assemblies  
30 to investigate the advantages and limitations of each. The results showed that ONT  
31 ultralong reads delivered higher contiguity producing a total of 18 contigs of which ten  
32 were assembled into a single chromosome compared to that of 394 contigs and three  
33 chromosome-level contigs for the PB assembly. The ONT ultralong reads also  
34 prevented assembly errors caused by long repetitive regions for which we observed a  
35 total of 44 genes of false redundancies and ten genes of false losses in the PB assembly  
36 leading to over/under-estimation of the gene families in those long repetitive regions.  
37 We also noted that the PB HiFi reads generated assemblies with considerably fewer  
38 errors at the level of single nucleotide and small InDels than that of the ONT assembly  
39 which generated an average 1.06 errors per kb and finally engendered 1,475 incorrect  
40 gene annotations via altered or truncated protein predictions.

41

42 **Key words:** assembly comparison, ONT ultralong, PB HiFi, CCS, single-molecular  
43 sequencer, contiguity

44

## 45 Findings

46  
47 The availability of reference genomes has revolutionized the study of biology – [the high](#)  
48 [quality human reference genome enabled the identification of disease causative alleles](#)  
49 [1,2]; the genomes of agricultural crops have tremendously accelerated our  
50 understanding on how artificial selection shaped plant traits and how, in turn, these  
51 plant traits may influence species interactions, e.g. phytophagous insects, in agriculture  
52 [3,4]. During the last decade, multiple competing technologies have been developed to  
53 improve the quality and robustness of genome assemblies [5–8], enabling genome  
54 reference collecting of the tree of life [9–11]. To date, a large number of genomes have  
55 been assembled by Third Generation Sequencing (TGS) technologies which can  
56 produce individual reads in the range of 10~100 kb or even longer [12–15]. Although  
57 the long-read still has a high error rate, it has been improving owing to the advances in  
58 sequencing chemistry and computational tools, e.g. Pacbio (PB) Single-molecule real-  
59 time (SMRT) sequencing platform released the Sequel II system of which the updated  
60 SMRT cell enabled high throughput HiFi reads using the circular consensus sequencing  
61 (CCS) mode to provide base-level resolution with > 99% single-molecule read accuracy  
62 [16]; while the Oxford Nanopore Technologies (ONT) launched its PromethION  
63 platform which can yield > 7 Tb per run and its ultralong sequencing application  
64 facilitates the achievement of complete genome - Telomere to Telomere (T2T) - by  
65 resolving long and complex repetitive regions for various species including *Homo*  
66 *sapien* [17]. [The two cutting edge sequencing technologies have enabled the sequencing](#)  
67 [of many species](#); however, almost all chose one single sequencing system, either the  
68 PB or the ONT platform, to obtain their reference genomes [15,18,19]. Here we present  
69 one rice individual (*Oryza sativa ssp. indica*,  $2n = 2x = 24$ , variety 9311) [20,21] that  
70 was sequenced and assembled independently using the two up-to-date systems, and  
71 then we compared the two assemblies to investigate the advantages and limitations of  
72 each.

73

74 Following DNA extraction from the rice sample, we sequenced the two extracts using  
75 ONT PromethION and PB Sequel II platforms, respectively. The PromethION  
76 generated a total of 92 Gb data (230X) with an N50 of 41,473 bp, and the Sequel II  
77 produced a total of 253 Gb data (632X) with each molecular fragment being sequenced  
78 14.72 times on average and produced ca. 20 Gb HiFi reads (50X) with an average length  
79 of 13,363 bp. We applied multiple software, including Canu1.9 [22], NextDenovo2.0-  
80 beta.1 (<https://github.com/Nextomics/NextDenovo>), WTDBG2.5 [23], Flye2.7.1 [24],  
81 SHASTA-0.4.0 [25] and NECAT (<https://github.com/xiaochuanle/NECAT>) to  
82 assemble the rice genome for both the ONT and PB dataset (Table S1), and then  
83 selected the optimal assembly for each sequencing platform based on contig N50 (Table  
84 S2). The ONT assembly showed higher contiguity with a contig number of 18 and an  
85 N50 value of ca. 32 Mb in comparison to a contig number of 394 and N50 of 17 Mb  
86 for the PB assembly (Figure 1a). Ten and three out of the total 12 autosomes were  
87 assembled into a single contig in the ONT and PB assembly, respectively. We identified  
88 telomeres and centromeres for both assemblies and found that seven of them reached a  
89 T2T level assembly with no gaps and no Ns in between (Table S3). A genome  
90 completeness assessment using BUSCOv3.1.0 [26] finds both assemblies performed  
91 well with the ONT having a tiny improvement (98.62% vs 98.33%, Table S4). We  
92 mapped both assemblies to a high-quality rice (R498) genome reference [20] using  
93 Minimap2 [27]. Both assemblies showed good collinearity (Figure S1) and the PB  
94 assembly contained more gaps compared to that of ONT (Figure 1a).

95

96 We then randomly took one chromosome (Chr. 6) where ONT's one single contig  
97 (32,367,127 bp) corresponded to nine contigs (32,476,323 bp) of the PB assembly to  
98 investigate and visualize the incongruencies between them. For the nine contigs of PB  
99 assembled for the Chr. 6, four reached a length  $\geq$  6 Mb and five had a length of merely  
100 10-70 kb. We investigated the three gaps where the top four PB contigs (named as PB-  
101 L1, PB-L2, PB-L3 and PB-L4 from 5' to 3' end, respectively) failed to connect (Figure  
102 1b). We mapped the ONT ultralong reads to those gaps and confirmed their correctness  
103 through manual inspections by IGV plot [28](Figure S2). The gap #1 between PB-L1



104 and PB-L2 reached a length of 74,888 bp. One of the short PB contigs (PB-S1, length  
105 of 70,208 bp) had an overlap of ~10 kb with the 3' end of PB-L1, thus left the gap #1 a  
106 region of 15,722 bp that PB failed to cover (Figure 1c). We further examined the  
107 sequences obtained by ONT in and flanking this gap. It showed that the overlapping  
108 and the gap regions represented two elements of 15 kb and 48 kb in length that, although  
109 have only one copy on Chr. 6, can find their duplications on Chr. 5 (Figure S3).  
110 Repetitive elements with such lengths go beyond the typical length generated by PB  
111 CCS, therefore the right path can hardly be disentangled from complicated string graphs  
112 [22,29]. The gap #2 between PB-L2 and PB-L3 characterized a region spanning up to  
113 48 kb on the ONT assembly and is flanked by two tandem repeats of 14 kb in length. It  
114 was **spanned** by multiple ONT long reads (Figure S2), so can be successfully connected  
115 by the ONT assembly. The last gap between PB-L3 and PB-L4 can be connected by  
116 one short PB contig (PB-S2, 25,292 bp), which had 9,469 and 2,621 bp overlaps with  
117 3' end of PB-L3 and 5' end of PB-L4, respectively. And it showed the same case as gap  
118 #2, containing three tandem duplicates of length 23 kb that failed to be connected by  
119 PB HiFi reads. We found a total of 107 kb redundancies and 15 kb gaps on Chr. 6 owing  
120 to PB's incorrect assembly, which corresponded to an excess of 13 annotated genes  
121 (Figure 2, Table S5). The genome-wide misassembled regions accumulated to a length  
122 of ~ 668 kb (534 kb redundancies and 134 kb gaps), hosting 54 annotated genes (44  
123 redundancies and 10 loss, Table S5). As PB assembly did not generate any single  
124 contigs that ONT broke into multiple segments, we cannot find a counter case for  
125 comparison. **In addition, a down-sampling test showed that the ONT dataset, unlike the**  
126 **PB data, can produce genome assemblies of the same contiguity level using half or one-**  
127 **third of raw reads, corroborating the central role that ultralong reads played in**  
128 **assembling genome regions with long repeats (Figure S4 and Table S6). It is also worth**  
129 **noting that PB can run in long read mode [30], which, although can hardly generate**  
130 **reads as long as the ONT ultralong reads, can aid in connecting some of the gaps caused**  
131 **by long repeats. Besides, longer PB libraries with HiFi reads reaching 20 kb [31] would**  
132 **be conducive to assembly contiguity as well.**

133

134 In addition to those gaps that PB failed to connect, we noticed that there were a bunch  
135 of small-scale mismatches ( $< 85$  bp) between the two assemblies. Firstly, we extracted  
136 the reciprocal matches  $\geq 1$  M between the two assemblies for comparison using  
137 QUAST [32]. Then, we mapped the PB HiFi reads to both genome assemblies to  
138 identify assembly errors under the assumption that HiFi reads provide high-level single-  
139 base accuracy. It showed that the ONT assembly, although polished using 70X  
140 Illumina's shotgun reads, still contained a large number of errors. In total, we found  
141 210,993 single nucleotide errors and 211,517 InDels (Mean: 1.39 bp, Figure S5)  
142 accounting for an average number of 1.06 errors per kb. However, instead of scattering  
143 evenly on the assembly, those errors formed into clusters (Figure S6). A further  
144 investigation for those regions showed  $\sim 94\%$  of them have a shotgun read coverage  $\leq$   
145 5, which explains why the last polishing step failed to fix those errors (Figure S7a). As  
146 those regions were well covered by ONT long reads (Figure S7b), we examined the GC  
147 content and methylation profiles for them speculating that different methylation  
148 patterns in such regions may have reduced the base calling accuracies there. The results  
149 showed that those ONT error-enriched regions contained higher or lower GC content  
150 and significantly higher methylation level compared to other genome regions (Figure  
151 S8). We also found that 7.48 % of those errors located on exons and affected  $\sim 2,415$   
152 exons (1,475 genes) to translate correctly to amino acid sequences on the ONT genome  
153 assembly. Most of those affected genes have multiple paralogous copies on the genome  
154 (Figure S9), rather than being single-copy orthologs utilized in the BUSCO analysis,  
155 revealing a limited performance of short-reads-based genome polishing methods for  
156 duplicated genes on the genome. In addition, we did note that the errors of HiFi reads  
157 may be enriched in sequences with particular characteristics, rather than completely  
158 random, for example, regions like simple sequence repeats and long homopolymers  
159 (Supplementary Methods, Figure S10) which may exacerbate the above error statistics  
160 for the ONT assembly. What's more, QUAST also reported some mismatches  $> 85$  bp  
161 between the two assemblies. A manual examination for several randomly-selected  
162 discrepancies on Chr. 6 showed that they were repeated regions incorrectly assembled

163 by PB, or regions with high methylation level where ONT errors enriched  
164 (Supplementary Methods and Figure S11).

165

166 In conclusion, our study investigated genome assembly qualities between the two up-  
167 to-date competing long read sequencing techniques - the PB's HiFi reads and the ONT's  
168 ultralong reads. It showed both techniques had their own merits with: (1) ONT ultralong  
169 reads delivered higher contiguity and prevented false redundancies caused by long  
170 repeats, which, in our case of the rice genome, assembled 10 out of the 12 autosomes  
171 into one single contig, and (2) PB HiFi reads produced fewer errors at the level of single  
172 nucleotide and small InDels and obtained more than 1,400 genes that incorrectly  
173 annotated in the ONT assembly due to its error-prone reads. Therefore, we suggest that  
174 further genomic studies, especially genome reference constructions, should leverage  
175 both techniques to lessen the impact of assembly errors and subsequent annotation  
176 mistakes rooted in each. There is also an urgent demand for improved assembly and  
177 error correction algorithms to fulfill this task.

178

## 179 **Methods**

### 180 *Sample preparation and sequencing*

181 The DNA used for ONT and PB sequel II platform sequencing were isolated from leaf  
182 tissues using SDS method and Q13323kit (QIAGEN), respectively (Supplementary  
183 Methods). The ONT platform generated a total of 6,100,295 pass reads with an average  
184 quality of 8.99 within 20 hours, and the PB sequel II platform generated a total of  
185 21,986,306 subreads with each molecular fragment being sequenced 14.72 times on  
186 average within 30 hours. Then, the PB subreads converted to HiFi reads using ccs  
187 (<https://github.com/PacificBiosciences/ccs>) with default parameters. Additionally, we  
188 generated a total of 188,590,034 shotgun reads (~70X) using a strategy of pair-end 150  
189 bp (PE 150) on the MGISEQ-2000 platform.

190

### 191 *Genome assembly and polishing*

192 After the genome assembly and selection (Table S1 & S2), we mapped the ONT raw  
193 reads and PB HiFi reads onto their corresponding genomes using Minimap2 [27] and  
194 conducted genome polishing using RACON [33] through three iterations. Then, for the  
195 ONT assembly we applied Medaka, a tool designed for ONT error correction, to  
196 conduct genome polishing once more. After that, NextPolish1.1.0 [34] was applied to  
197 fix small-scale errors (SNVs and InDels) for the ONT assembly using shotgun reads.  
198 We did not apply the shotgun-read-based polishing step to the PB assembly, since HiFi  
199 reads of PB platform have already reached an accurate rate of 99% as high as that of  
200 the shotgun reads.

201

#### 202 *Identification for Centromeres and Telomeres*

203 We identified centromere and telomere-related sequences using the RCS2 family  
204 repeats and 5'-AAACCCT-3' repeats, respectively [20,35]. For centromeres, we first  
205 aligned the sequences of RCS2 family (AF058902.1) onto both the ONT and PB  
206 assemblies using BWA-MEM [36], and regions that contained full units of RCS2 family  
207 were identified as centromeres. Telomeres were identified by searching for 5'-  
208 AAACCCT-3' repeats on each contig using Tandem Repeats Finder with default  
209 parameters [37].

210

#### 211 *Assembly comparison*

212 **Collinearity:** We aligned both assemblies to a high-quality rice genome (variety R498,  
213 Accession ID: GCA\_002151415.1) using minimap2 [27] with a parameter setting of -  
214 x asm5. Then, we visualized the collinearity between the reference and query genomes  
215 using dotPlotly (<https://github.com/tpoorten/dotPlotly>, -t, -l, -m 30000, -q 1000000).

216 **Gap identification:** We aligned the PB assembly onto the ONT assembly using  
217 minimap2 [27] (-x asm5) and kept the primary hit for each contig. Then, we examined  
218 the alignment boundaries for each contig and identified the corresponding gap positions  
219 for each contig.

220 **Identification of mismatches between ONT and PB assembly:** we extracted the

221 reciprocal matches  $\geq 1$  M between the two assemblies for comparison using QUA  
222 5.0.2 with default parameters [32]. QUA  
223 ST categorized mismatches into two different  
224 types: local mismatches  $> 85$  bp and small-scale mismatches including SNVs and small  
225 InDels.

225 **Identification of errors in forms of single nucleotide and small Indels:** We aligned  
226 PB HiFi reads onto the ONT assembly and then identified SNPs and InDels using  
227 GATK4 [38] with filtering parameters:  $QD < 2.0 \parallel MQ < 40.0 \parallel FS > 60.0 \parallel SOR > 3.0$   
228  $\parallel MQRankSum < -12.5 \parallel ReadPosRankSum < -8.0$  for SNPs, and  $QD < 2.0 \parallel FS >$   
229  $200.0 \parallel SOR > 10.0 \parallel MQRankSum < -12.5 \parallel ReadPosRankSum < -8.0$  for indels. Given  
230 that both the PB and ONT assembly contain one suite of the diploid genome and the  
231 discrepancies between them can present the heterozygous sites in the genome, we  
232 removed those that were identified to be heterozygous, and regarded those homozygous  
233 derived alleles (1/1) as ONT errors.

234 **Gene loss and redundancies:** In the case that multiple PB assembly contigs mapped  
235 onto the same regions of the ONT assembly, we defined the relatively shorter ones as  
236 redundancies conditional on the following two criteria: (1) have a similarity score  $\geq$   
237 97% between each other; (2) have a total depth  $< 60$  and both have depths  $< 40$  (Figure  
238 2a). In addition, the gaps (showed in Figure 1) failed to be covered or covered twice by  
239 the PB contigs were defined as losses and redundancies, respectively (Figure 2b).  
240 Finally, those regions that contained genes contributed to the final gene loss and  
241 redundancy statistics.

242 **Incorrect translation caused by ONT errors:** Firstly, we searched for ONT errors that  
243 located on exons based on gene annotations of both the ONT and PB assembly. For the  
244 exon inconsistencies between the two assemblies (present/absent and mismatches), we  
245 aligned amino acid sequences of the PB assembly onto corresponding ONT regions  
246 using exonerate [39] (`--model protein2genome --refine full -n 1`) to investigate how the  
247 ONT errors affected gene translation.

248

249 *DNA methylation*

250 We calculated the genome-wide methylation level for the ONT assembly using  
251 Nanopolish v0.11.1 (<https://github.com/jts/nanopolish/>) with `called_sites`  $\geq 10$ . The  
252 methylation profiles and GC content were recorded throughout the genome with a  
253 window size of 1,000 bp and a step length of 500 bp. Windows that contains  $\geq 5$  ONT  
254 errors were defined as ONT error-enriched regions and were utilized to compare for the  
255 methylation and GC content with other genomic regions.



## 256 **Availability of data and materials**

257 We have all the data including two genome assemblies and their corresponding raw  
258 reads deposited on NCBI under the project ID PRJNA600693.

259

## 260 **Competing interests**

261 The authors declare that they have no competing interests.

262

## 263 **References**

- 264 1. Weischenfeldt J, Symmons O, Spitz F, Korbel JO. Phenotypic impact of genomic  
265 structural variation: insights from and for human disease. *Nat Rev Genet.* 2013;14:125–  
266 38.
- 267 2. Fujimoto A, Furuta M, Totoki Y, Tsunoda T, Kato M, Shiraishi Y, et al. Whole-  
268 genome mutational landscape and characterization of noncoding and structural  
269 mutations in liver cancer. *Nat Genet.* 2016;48:500.
- 270 3. Saxena RK, Edwards D, Varshney RK. Structural variations in plant genomes. *Brief*  
271 *Funct Genomics.* 2014;13:296–307.
- 272 4. Chen YH, Gols R, Benrey B. Crop domestication and its impact on naturally selected  
273 trophic interactions. *Annu Rev Entomol.* 2015;60:35–58.
- 274 5. Wheeler DA, Srinivasan M, Egholm M, Shen Y, Chen L, McGuire A, et al. The  
275 complete genome of an individual by massively parallel DNA sequencing. *Nature.*  
276 2008;452:872–6.
- 277 6. Bentley DR, Balasubramanian S, Swerdlow HP, Smith GP, Milton J, Brown CG, et  
278 al. Accurate whole human genome sequencing using reversible terminator chemistry.  
279 *Nature.* 2008;456:53–9.
- 280 7. Pushkarev D, Neff NF, Quake SR. Single-molecule sequencing of an individual  
281 human genome. *Nat Biotechnol.* 2009;27:847.
- 282 8. Rothberg JM, Hinz W, Rearick TM, Schultz J, Mileski W, Davey M, et al. An  
283 integrated semiconductor device enabling non-optical genome sequencing. *Nature.*  
284 2011;475:348–52.
- 285 9. Seberg O, Droege G, Barker K, Coddington JA, Funk V, Gostel M, et al. Global  
286 Genome Biodiversity Network: saving a blueprint of the Tree of Life—a botanical  
287 perspective. *Ann Bot.* 2016;118:393–9.
- 288 10. Mukherjee S, Seshadri R, Varghese NJ, Eloë-Fadrosch EA, Meier-Kolthoff JP,  
289 Göker M, et al. 1,003 reference genomes of bacterial and archaeal isolates expand  
290 coverage of the tree of life. *Nat Biotechnol.* 2017;35:676.
- 291 11. Lewin HA, Robinson GE, Kress WJ, Baker WJ, Coddington J, Crandall KA, et al.  
292 Earth BioGenome Project: sequencing life for the future of life. *Proc Natl Acad Sci.*  
293 2018;115:4325–33.
- 294 12. Chaisson MJP, Huddleston J, Dennis MY, Sudmant PH, Malig M, Hormozdiari F,

295 et al. Resolving the complexity of the human genome using single-molecule sequencing.  
296 Nature. 2015;517:608–11.

297 13. VanBuren R, Bryant D, Edger PP, Tang H, Burgess D, Challabathula D, et al.  
298 Single-molecule sequencing of the desiccation-tolerant grass *Oropetium thomaeum*.  
299 Nature. 2015;527:508–11.

300 14. Gordon D, Huddleston J, Chaisson MJP, Hill CM, Kronenberg ZN, Munson KM,  
301 et al. Long-read sequence assembly of the gorilla genome. Science. 2016;352:aae0344.

302 15. Jiao Y, Peluso P, Shi J, Liang T, Stitzer MC, Wang B, et al. Improved maize  
303 reference genome with single-molecule technologies. Nature. 2017;546:524–7.

304 16. Wenger AM, Peluso P, Rowell WJ, Chang P-C, Hall RJ, Concepcion GT, et al.  
305 Accurate circular consensus long-read sequencing improves variant detection and  
306 assembly of a human genome. Nat Biotechnol. 2019;37:1155–62.

307 17. Miga KH, Koren S, Rhie A, Vollger MR, Gershman A, Bzikadze A, et al. Telomere-  
308 to-telomere assembly of a complete human X chromosome. bioRxiv. 2019;735928.

309 18. Loman NJ, Quick J, Simpson JT. A complete bacterial genome assembled *de novo*  
310 using only nanopore sequencing data. Nat Methods. 2015;12:733–5.

311 19. Jain M, Koren S, Miga KH, Quick J, Rand AC, Sasani TA, et al. Nanopore  
312 sequencing and assembly of a human genome with ultra-long reads. Nat Biotechnol.  
313 2018;36:338.

314 20. Du H, Yu Y, Ma Y, Gao Q, Cao Y, Chen Z, et al. Sequencing and *de novo* assembly  
315 of a near complete *indica* rice genome. Nat Commun. 2017;8.

316 21. Yu J, Wang J, Lin W, Li S, Li H, Zhou J, et al. The genomes of *Oryza sativa*: a  
317 history of duplications. PLoS Biol. 2005;3.

318 22. Koren S, Walenz BP, Berlin K, Miller JR, Bergman NH, Phillippy AM. Canu:  
319 scalable and accurate long-read assembly via adaptive k-mer weighting and repeat  
320 separation. Genome Res. 2017;27:722–36.

321 23. Ruan J, Li H. Fast and accurate long-read assembly with wtdbg2. Nat Methods.  
322 2020;17:155–8.

323 24. Kolmogorov M, Yuan J, Lin Y, Pevzner PA. Assembly of long, error-prone reads  
324 using repeat graphs. Nat Biotechnol. 2019;37:540–6.

325 25. Shafin K, Pesout T, Lorig-Roach R, Haukness M, Olsen HE, Bosworth C, et al.  
326 Nanopore sequencing and the Shasta toolkit enable efficient *de novo* assembly of eleven  
327 human genomes. Nat Biotechnol. 2020;1–10.

328 26. Seppy M, Manni M, Zdobnov EM. BUSCO: assessing genome assembly and  
329 annotation completeness. Gene Predict. 2019;227–45.

330 27. Li H. Minimap2: pairwise alignment for nucleotide sequences. Bioinformatics.  
331 2018;34:3094–100.

332 28. Robinson JT, Thorvaldsdóttir H, Winckler W, Guttman M, Lander ES, Getz G, et  
333 al. Integrative genomics viewer. Nat Biotechnol. 2011;29:24–6.

334 29. Myers EW. The fragment assembly string graph. Bioinformatics. 2005;21:79–85.

335 30. Rhoads A, Au KF. PacBio sequencing and its applications. GPB. 2015;13:278–89.

336 31. Nurk S, Walenz BP, Rhie A, Vollger MR, Logsdon GA, Grothe R, et al. HiCanu:  
337 accurate assembly of segmental duplications, satellites, and allelic variants from high-  
338 fidelity long reads. bioRxiv. 2020.

- 339 32. Mikheenko A, Prjibelski A, Saveliev V, Antipov D, Gurevich A. Versatile genome  
340 assembly evaluation with QUAST-LG. *Bioinformatics*. 2018;34:i142–50.
- 341 33. Vaser R, Sović I, Nagarajan N, Šikić M. Fast and accurate *de novo* genome  
342 assembly from long uncorrected reads. *Genome Res*. 2017;27:737–46.
- 343 34. Hu J, Fan J, Sun Z, Liu S. NextPolish: a fast and efficient genome polishing tool  
344 for long read assembly. *Bioinformatics*. 2019.
- 345 35. Dong F, Miller JT, Jackson SA, Wang G-L, Ronald PC, Jiang J. Rice (*Oryza sativa*)  
346 centromeric regions consist of complex DNA. *Proc Natl Acad Sci*. 1998;95:8135–40.
- 347 36. Li H, Durbin R. Fast and accurate short read alignment with Burrows–Wheeler  
348 transform. *Bioinformatics*. 2009;25:1754–60.
- 349 37. Benson G. Tandem repeats finder: a program to analyze DNA sequences. *Nucleic*  
350 *Acids Res*. 1999;27:573–80.
- 351 38. McKenna A, Hanna M, Banks E, Sivachenko A, Cibulskis K, Kernytzky A, et al.  
352 The Genome Analysis Toolkit: a MapReduce framework for analyzing next-generation  
353 DNA sequencing data. *Genome Res*. 2010;20:1297–303.
- 354 39. Slater GSC, Birney E. Automated generation of heuristics for biological sequence  
355 comparison. *BMC Bioinformatics*. 2005;6:31.
- 356

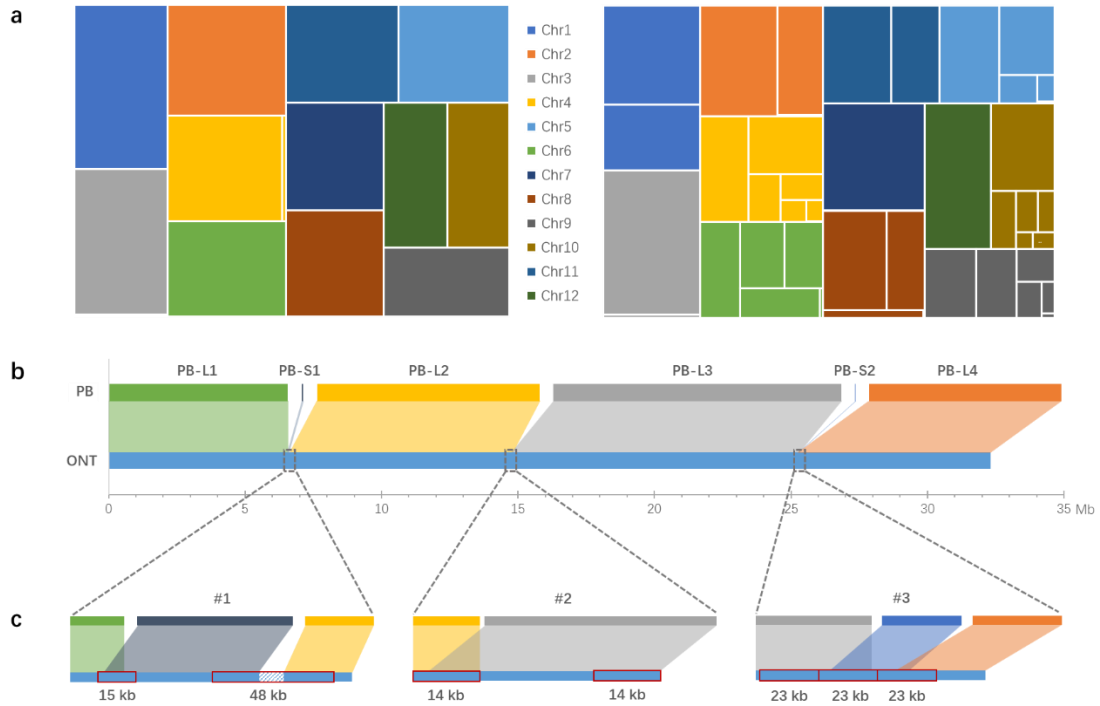

**Figure 1. Contiguity of the ONT and PB assemblies.** (a) Treemaps for contig length difference between the ONT (left) and PB (right) assembly; (b) The six PB contigs mapped to one ONT contig corresponding to Chr. 6; (c) Details of the three PB gaps. Red rectangles noted the repeat elements.

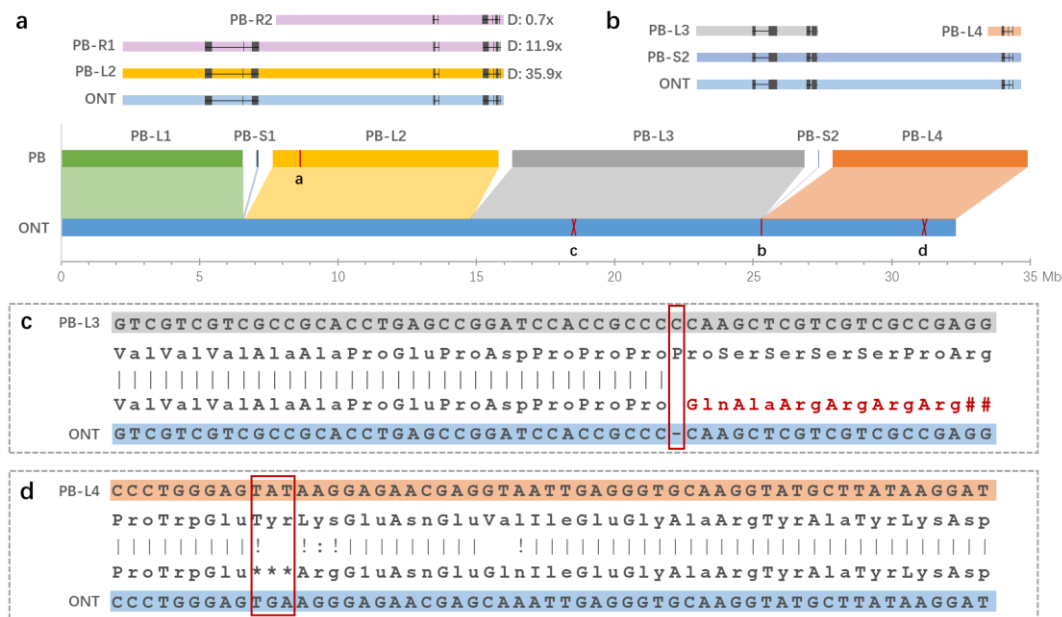

**Figure 2. Assembly errors in which genes can be annotated.** (a) An example shows gene gains that caused by assembly redundancies, of which the PB-R1 and PB-R2 had a similarity level of 99.67% and 99.51%, respectively, compared to the corresponding region on PB-L2, and “D” abbreviates from depth; (b) The gene redundancies caused by gaps that failed to be correctly connected by the PB assembly; (c) An example shows a 1-base deletion led to frameshift mistake for protein translation; (d) An example shows single base error led to stop codon gain and truncated protein translation.

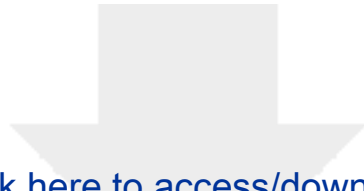

Click here to access/download  
**Supplementary Material**  
Supplementary file-20200702.pdf

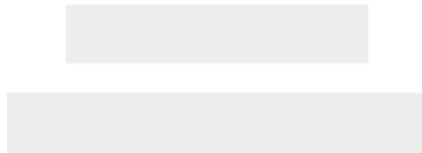

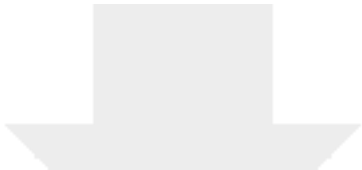

Click here to access/download  
**Supplementary Material**  
Figure S1.pdf





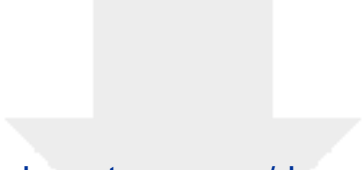

Click here to access/download  
**Supplementary Material**  
Figure S3.pdf





Click here to access/download  
**Supplementary Material**  
Figure S5.pdf



Click here to access/download  
**Supplementary Material**  
Figure S7.pdf

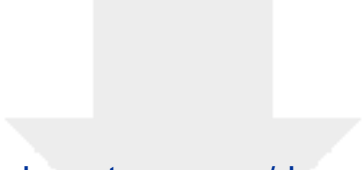

Click here to access/download  
**Supplementary Material**  
Figure S9.pdf





Click here to access/download  
**Supplementary Material**  
Figure S10.pdf



Click here to access/download  
**Supplementary Material**  
Figure S11.pdf





Click here to access/download  
**Supplementary Material**  
Figure S2.svg



Click here to access/download  
**Supplementary Material**  
Figure S4.svg



Click here to access/download  
**Supplementary Material**  
Figure S6.svg



Click here to access/download  
**Supplementary Material**  
Figure S8.svg

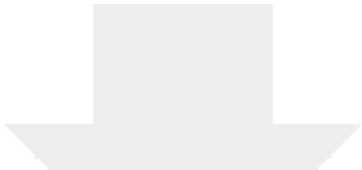

Click here to access/download  
**Supplementary Material**  
Figure 1.svg





Click here to access/download  
**Supplementary Material**  
Figure 2.svg



Supplement: giaa123_giga-d-20-00061_revision_1.pdf [file giaa123_giga-d-20-00061_revision_1.pdf]
