# Supplementary material for: Comparison of the two up-to-date sequencing technologies for genome assembly: HiFi reads of Pacific Biosciences Sequel II system and ultralong reads of Oxford Nanopore
Source: PubMed Central journal article supplement (PMC7736813; doi:10.1093/gigascience/giaa123), 2020-12-15

## Comparison of the two up-to-date sequencing technologies for genome assembly: HiFi reads of Pacbio Sequel II system and ultralong reads of Oxford Nanopore --Manuscript Draft--

|                                                      |                                                                                                                                                                                                                                                                                                                                                                                                                                                                                                                                                                                                                                                                                                                                                                                                                                                                                                                                                                                                                                                                                                                                                                                                                                                                                                                                                                                                                                                                                                                                                             |
|------------------------------------------------------|-------------------------------------------------------------------------------------------------------------------------------------------------------------------------------------------------------------------------------------------------------------------------------------------------------------------------------------------------------------------------------------------------------------------------------------------------------------------------------------------------------------------------------------------------------------------------------------------------------------------------------------------------------------------------------------------------------------------------------------------------------------------------------------------------------------------------------------------------------------------------------------------------------------------------------------------------------------------------------------------------------------------------------------------------------------------------------------------------------------------------------------------------------------------------------------------------------------------------------------------------------------------------------------------------------------------------------------------------------------------------------------------------------------------------------------------------------------------------------------------------------------------------------------------------------------|
| <b>Manuscript Number:</b>                            | GIGA-D-20-00061R2                                                                                                                                                                                                                                                                                                                                                                                                                                                                                                                                                                                                                                                                                                                                                                                                                                                                                                                                                                                                                                                                                                                                                                                                                                                                                                                                                                                                                                                                                                                                           |
| <b>Full Title:</b>                                   | Comparison of the two up-to-date sequencing technologies for genome assembly: HiFi reads of Pacbio Sequel II system and ultralong reads of Oxford Nanopore                                                                                                                                                                                                                                                                                                                                                                                                                                                                                                                                                                                                                                                                                                                                                                                                                                                                                                                                                                                                                                                                                                                                                                                                                                                                                                                                                                                                  |
| <b>Article Type:</b>                                 | Technical Note                                                                                                                                                                                                                                                                                                                                                                                                                                                                                                                                                                                                                                                                                                                                                                                                                                                                                                                                                                                                                                                                                                                                                                                                                                                                                                                                                                                                                                                                                                                                              |
| <b>Funding Information:</b>                          |                                                                                                                                                                                                                                                                                                                                                                                                                                                                                                                                                                                                                                                                                                                                                                                                                                                                                                                                                                                                                                                                                                                                                                                                                                                                                                                                                                                                                                                                                                                                                             |
| <b>Abstract:</b>                                     | <p>The availability of reference genomes has revolutionized the study of biology. Multiple competing technologies have been developed to improve the quality and robustness of genome assemblies during the last decade. The two widely-used long-read sequencing providers – Pacbio (PB) and Oxford Nanopore Technologies (ONT) – have recently updated their platforms: PB enables high throughput HiFi reads with base-level resolution with &gt;99% and ONT generated reads as long as 2 Mb. We applied the two up-to-date platforms to one single rice individual and then compared the two assemblies to investigate the advantages and limitations of each. The results showed that ONT ultralong reads delivered higher contiguity producing a total of 18 contigs of which ten were assembled into a single chromosome compared to that of 394 contigs and three chromosome-level contigs for the PB assembly. The ONT ultralong reads also prevented assembly errors caused by long repetitive regions for which we observed a total of 44 genes of false redundancies and ten genes of false losses in the PB assembly leading to over/under-estimation of the gene families in those long repetitive regions. We also noted that the PB HiFi reads generated assemblies with considerably fewer errors at the level of single nucleotide and small InDels than that of the ONT assembly which generated an average 1.06 errors per Kb and finally engendered 1,475 incorrect gene annotations via altered or truncated protein predictions.</p> |
| <b>Corresponding Author:</b>                         | Shanlin Liu                                                                                                                                                                                                                                                                                                                                                                                                                                                                                                                                                                                                                                                                                                                                                                                                                                                                                                                                                                                                                                                                                                                                                                                                                                                                                                                                                                                                                                                                                                                                                 |
| <b>Corresponding Author Secondary Information:</b>   |                                                                                                                                                                                                                                                                                                                                                                                                                                                                                                                                                                                                                                                                                                                                                                                                                                                                                                                                                                                                                                                                                                                                                                                                                                                                                                                                                                                                                                                                                                                                                             |
| <b>Corresponding Author's Institution:</b>           |                                                                                                                                                                                                                                                                                                                                                                                                                                                                                                                                                                                                                                                                                                                                                                                                                                                                                                                                                                                                                                                                                                                                                                                                                                                                                                                                                                                                                                                                                                                                                             |
| <b>Corresponding Author's Secondary Institution:</b> |                                                                                                                                                                                                                                                                                                                                                                                                                                                                                                                                                                                                                                                                                                                                                                                                                                                                                                                                                                                                                                                                                                                                                                                                                                                                                                                                                                                                                                                                                                                                                             |
| <b>First Author:</b>                                 | DanDan Lang                                                                                                                                                                                                                                                                                                                                                                                                                                                                                                                                                                                                                                                                                                                                                                                                                                                                                                                                                                                                                                                                                                                                                                                                                                                                                                                                                                                                                                                                                                                                                 |
| <b>First Author Secondary Information:</b>           |                                                                                                                                                                                                                                                                                                                                                                                                                                                                                                                                                                                                                                                                                                                                                                                                                                                                                                                                                                                                                                                                                                                                                                                                                                                                                                                                                                                                                                                                                                                                                             |
| <b>Order of Authors:</b>                             | <p>DanDan Lang</p> <p>Shilai Zhang</p> <p>Pingping Ren</p> <p>Fan Liang</p> <p>Zongyi Sun</p> <p>Guanliang Meng</p> <p>Yuntao Tan</p> <p>Xiaokang Li</p> <p>Qihua Lai</p> <p>Lingling Han</p> <p>Depeng Wang</p>                                                                                                                                                                                                                                                                                                                                                                                                                                                                                                                                                                                                                                                                                                                                                                                                                                                                                                                                                                                                                                                                                                                                                                                                                                                                                                                                            |

|                                                |                                                                                                                                                                                                                                                                                                                                                                                                                                                                                                                                                                                                                                                                                                                                                                                                                                                                                                                                                                                                                                                                                                                                                                                                                                                                                                                                                                                                                                                                                                                                                                                                                                                                                                                                                                                                                                                                                                                                                                                                                                                                                                                                                                                                                                                                                                                                                                                                                                                                                                                                                                                                                                                                                                                                                                                                                                                                                                                                                                                               |
|------------------------------------------------|-----------------------------------------------------------------------------------------------------------------------------------------------------------------------------------------------------------------------------------------------------------------------------------------------------------------------------------------------------------------------------------------------------------------------------------------------------------------------------------------------------------------------------------------------------------------------------------------------------------------------------------------------------------------------------------------------------------------------------------------------------------------------------------------------------------------------------------------------------------------------------------------------------------------------------------------------------------------------------------------------------------------------------------------------------------------------------------------------------------------------------------------------------------------------------------------------------------------------------------------------------------------------------------------------------------------------------------------------------------------------------------------------------------------------------------------------------------------------------------------------------------------------------------------------------------------------------------------------------------------------------------------------------------------------------------------------------------------------------------------------------------------------------------------------------------------------------------------------------------------------------------------------------------------------------------------------------------------------------------------------------------------------------------------------------------------------------------------------------------------------------------------------------------------------------------------------------------------------------------------------------------------------------------------------------------------------------------------------------------------------------------------------------------------------------------------------------------------------------------------------------------------------------------------------------------------------------------------------------------------------------------------------------------------------------------------------------------------------------------------------------------------------------------------------------------------------------------------------------------------------------------------------------------------------------------------------------------------------------------------------|
|                                                | Fengyi Hu                                                                                                                                                                                                                                                                                                                                                                                                                                                                                                                                                                                                                                                                                                                                                                                                                                                                                                                                                                                                                                                                                                                                                                                                                                                                                                                                                                                                                                                                                                                                                                                                                                                                                                                                                                                                                                                                                                                                                                                                                                                                                                                                                                                                                                                                                                                                                                                                                                                                                                                                                                                                                                                                                                                                                                                                                                                                                                                                                                                     |
|                                                | Wen Wang                                                                                                                                                                                                                                                                                                                                                                                                                                                                                                                                                                                                                                                                                                                                                                                                                                                                                                                                                                                                                                                                                                                                                                                                                                                                                                                                                                                                                                                                                                                                                                                                                                                                                                                                                                                                                                                                                                                                                                                                                                                                                                                                                                                                                                                                                                                                                                                                                                                                                                                                                                                                                                                                                                                                                                                                                                                                                                                                                                                      |
|                                                | Shanlin Liu                                                                                                                                                                                                                                                                                                                                                                                                                                                                                                                                                                                                                                                                                                                                                                                                                                                                                                                                                                                                                                                                                                                                                                                                                                                                                                                                                                                                                                                                                                                                                                                                                                                                                                                                                                                                                                                                                                                                                                                                                                                                                                                                                                                                                                                                                                                                                                                                                                                                                                                                                                                                                                                                                                                                                                                                                                                                                                                                                                                   |
| <b>Order of Authors Secondary Information:</b> |                                                                                                                                                                                                                                                                                                                                                                                                                                                                                                                                                                                                                                                                                                                                                                                                                                                                                                                                                                                                                                                                                                                                                                                                                                                                                                                                                                                                                                                                                                                                                                                                                                                                                                                                                                                                                                                                                                                                                                                                                                                                                                                                                                                                                                                                                                                                                                                                                                                                                                                                                                                                                                                                                                                                                                                                                                                                                                                                                                                               |
| <b>Response to Reviewers:</b>                  | <p>Dear Editor,</p> <p>Thank you for handling the review of our manuscript. We appreciate your rapid feedback and the constructive reviews from the editorial board members and the reviewers. We have comprehensively addressed this feedback in our response below. We hope that this version of our manuscript is now suitable for publication in GigaScience.</p> <p>Sincerely</p> <p>Shanlin Liu</p> <p>Comments from the Editorial Board Members:</p> <p>1) Reviewer 2 in particular agrees with reviewer 3 that a direct comparison of similar methods would have been preferred - please discuss this in the manuscript.</p> <p>&gt;&gt;&gt; Thank you for your suggestion. We agreed that readers could be interested in not only the N50 value of the assemblies generated by different software, but also the assembly accuracy. In the revised version, we added the assembly accuracy estimations for all the assemblies. As a result, it now includes the comparisons between the assemblies generated using same software and analysis pipeline (Lines 169-174 and Figure 3).</p> <p>2) Also the use of a new assembly method is problematic, as it is not well known in the field. I understand that validating this new method is outside the scope of your paper, but I recommend you mention this also as a limitation in the manuscript.</p> <p>&gt;&gt;&gt; We added this limitation at lines 183-189. It reads "However, the current study has several limitations, including, among others, (1) NextDenovo which generated the most contiguous assembly for the ONT is a newly developed assembler that has not been validated its performance on other species; (2) the rice which has a relatively small and simple genome cannot characterize the full spectrum of the strength and weakness of the two sequencing technologies. Genome studies, especially for those large and complex genomes, will shed more light on this matter.". Furthermore, we noted that the developer of NextDenovo have updated their Github page which now includes its performance benchmarking to several widely-used assemblers, such as Canu, Flye, et al., using human genome.</p> <p>3) I recommend that you also briefly discuss the concern that, being a case study in rice, the results may not be readily applicable to other species, as each species has its own challenges.</p> <p>&gt;&gt;&gt; Agree. Please find the above response #2.</p> <p>Please also address the other latest comments of reviewers 1 and 2 in a second revised manuscript.<br/>(I note that reviewer 2 could not access the FTP for supporting data- not quite sure where the problem is, as it seems to be working at my end ... our data curators can help the reviewer, if needed).</p> <p>&gt;&gt;&gt; It will be great that you can help the reviewer #2 to get the data on the FTP in the case that he/she fails to access the NCBI data as well.</p> <p>Comments from the Reviewers:</p> |

Reviewer #1: Thanks for address most of the points I raised. The revised manuscript is a good improvement. Thanks. One minor thing, I am not sure the term "one suite of a diploid genome" is the right way to describe one single haplotype of the homologous chromosomes, please consider to the revise that for the manuscript.

>>> Thank you for your suggestion. We changed it to "one set of the paired chromosomes" at line 248 according to your advice.

Reviewer #2: The authors have addressed the concerns I raised in my first review. However, I agree with reviewer#3 on numerous points and the authors responses do raise more questions than they answer.

The authors state:

"It is weird that the reviewer argued about the reliability of its assembly results because it generated a much better results compared to the other software. It is worth noting that its readme text on github states that it performs well especially for ONT ultra-long reads."

Reviewer#3 is saying that there is no information on this assembler and relying on N50 is not a good gauge of whether the assembler is doing a good job. Also, it doesn't really matter what the readme states on github. Until a technology is proven to work, and in this case work well with ONT data, it is impossible to judge without evidence.

These comments also exposed an aspect of the paper which could be improved. The authors are arguing they are trying to make a dataset that will inform researchers how to leverage sequencing platforms for a specific goal. However, the analysis is not parallel in the sense that the authors don't compare similar assembly and polishing methods. It is great that the authors added the results from other assemblers. What would be even better is if the analysis was augmented to compare each of those assemblies. At the very least the main comparison should use the same assembly method.

>>> Thank you for your reminding. We realized that the good performance of this new assembly method (NextDenovo) for rice cannot prove that it can give equivalent performances to other species as well, and this might be a big flaw of the current study. Therefore, we firstly included some additional discussions to expose the limitations of the current work, and also included the comparisons that used the same assembly method. Please find our response #1 and #2 to the editorial board members.

Reveiwler#3 also made several other good points that the authors should take more care in addressing.

The methylation addition was a highlight. Since the technologies are moving so fast, and this manuscript is really about technology, have the authors tried the new methylation aware base-calling for ONT? Since so many of the base calling errors in ONT are due to modified bases at this point, it seems very important for the authors to present the most up to date analysis.

>>> We used the latest official release software GUPPY for basecalling, in which we failed to find any parameters specific for methylation. However, as far as we know, the performance of any particular ONT basecaller is influenced by the data used to train its model. Therefore, basecalling for native DNA (not PCR products) can perform much better in the case that their modifications and sequence motifs are represented in its training set compared to that not [1]. Inclusion of a species-specific training set for rice is feasible and will benefit the assembly accuracy for the ONT assemblies, which, however, violating our initial purpose of this study. Because most species cannot achieve such a training set as they do not have genome sequences that are publicly available, and will make the current work an unfair comparison. We added this alternative solution at lines 151-153. It reads "Providing a training set that includes information of modifications and sequence motifs of rice could at some extent alleviate the error rate of the ONT assembly."

Thank you for including the FTP. After several tries on different days, I could not download the full assemblies to validate the claims.

|                                                                                                                                                                                                                                                                                                                                                                                                                                    |                                                                                                                                                                                                                                                                                                                                                                                                                                                                                                                                                                                                                                                                                                                                                                                                                                                                                                                                                                                                                                                                      |
|------------------------------------------------------------------------------------------------------------------------------------------------------------------------------------------------------------------------------------------------------------------------------------------------------------------------------------------------------------------------------------------------------------------------------------|----------------------------------------------------------------------------------------------------------------------------------------------------------------------------------------------------------------------------------------------------------------------------------------------------------------------------------------------------------------------------------------------------------------------------------------------------------------------------------------------------------------------------------------------------------------------------------------------------------------------------------------------------------------------------------------------------------------------------------------------------------------------------------------------------------------------------------------------------------------------------------------------------------------------------------------------------------------------------------------------------------------------------------------------------------------------|
|                                                                                                                                                                                                                                                                                                                                                                                                                                    | <p>&gt;&gt;&gt; Please find our response #4 to the editorial board members.</p> <p>Minor edits<br/>These are not assembly errors, they are SNPs/INDELs resulting from mis-called bases.<br/>138 "identify assembly errors under the assumption that HiFi reads provide high-level..."</p> <p>&gt;&gt;&gt; Corrected.</p> <p>"suggesting" would be more accurate then revealing since<br/>134 "revealing a limited performance of short-reads-based genome polishing methods for"</p> <p>&gt;&gt;&gt; Corrected.</p> <p>Reword "by PB, or regions with high methylation level where ONT errors enriched", PB is not an assembler<br/>"discrepancies on Chr. 6 showed that they were repeated regions incorrectly assembled by PB, or regions with high methylation level where ONT errors enriched (Supplementary Methods and Figure S11)."</p> <p>&gt;&gt;&gt; We corrected it to "using PB reads".</p> <p>Reference<br/>1. Wick RR, Judd LM, Holt KE. Performance of neural network basecalling tools for Oxford Nanopore sequencing. Genome Biol. 2019;20:129.</p> |
| <b>Additional Information:</b>                                                                                                                                                                                                                                                                                                                                                                                                     |                                                                                                                                                                                                                                                                                                                                                                                                                                                                                                                                                                                                                                                                                                                                                                                                                                                                                                                                                                                                                                                                      |
| <b>Question</b>                                                                                                                                                                                                                                                                                                                                                                                                                    | <b>Response</b>                                                                                                                                                                                                                                                                                                                                                                                                                                                                                                                                                                                                                                                                                                                                                                                                                                                                                                                                                                                                                                                      |
| Are you submitting this manuscript to a special series or article collection?                                                                                                                                                                                                                                                                                                                                                      | No                                                                                                                                                                                                                                                                                                                                                                                                                                                                                                                                                                                                                                                                                                                                                                                                                                                                                                                                                                                                                                                                   |
| <p><b>Experimental design and statistics</b></p> <p>Full details of the experimental design and statistical methods used should be given in the Methods section, as detailed in our <a href="#">Minimum Standards Reporting Checklist</a>. Information essential to interpreting the data presented should be made available in the figure legends.</p> <p>Have you included all the information requested in your manuscript?</p> | Yes                                                                                                                                                                                                                                                                                                                                                                                                                                                                                                                                                                                                                                                                                                                                                                                                                                                                                                                                                                                                                                                                  |
| <p><b>Resources</b></p> <p>A description of all resources used, including antibodies, cell lines, animals and software tools, with enough information to allow them to be uniquely identified, should be included in the</p>                                                                                                                                                                                                       | Yes                                                                                                                                                                                                                                                                                                                                                                                                                                                                                                                                                                                                                                                                                                                                                                                                                                                                                                                                                                                                                                                                  |

|                                                                                                                                                                                                                                                                                                                                                                                                                                                                                                                                                         |            |
|---------------------------------------------------------------------------------------------------------------------------------------------------------------------------------------------------------------------------------------------------------------------------------------------------------------------------------------------------------------------------------------------------------------------------------------------------------------------------------------------------------------------------------------------------------|------------|
| <p>Methods section. Authors are strongly encouraged to cite <a href="#">Research Resource Identifiers</a> (RRIDs) for antibodies, model organisms and tools, where possible.</p> <p>Have you included the information requested as detailed in our <a href="#">Minimum Standards Reporting Checklist</a>?</p>                                                                                                                                                                                                                                           |            |
| <p><b>Availability of data and materials</b></p> <p>All datasets and code on which the conclusions of the paper rely must be either included in your submission or deposited in <a href="#">publicly available repositories</a> (where available and ethically appropriate), referencing such data using a unique identifier in the references and in the “Availability of Data and Materials” section of your manuscript.</p> <p>Have you have met the above requirement as detailed in our <a href="#">Minimum Standards Reporting Checklist</a>?</p> | <p>Yes</p> |

1 **Comparison of the two up-to-date sequencing technologies for genome assembly:**  
2 **HiFi reads of Pacbio Sequel II system and ultralong reads of Oxford Nanopore**

3

4 Dandan Lang<sup>1#</sup>, Shilai Zhang<sup>2#</sup>, Pingping Ren<sup>1</sup>, Fan Liang<sup>1</sup>, Zongyi Sun<sup>1</sup>, Guanliang Meng<sup>1</sup>, Yuntao Tan<sup>1</sup>, Xiaokang  
5 Li, Qihua Lai, Lingling Han<sup>1</sup>, Depeng Wang<sup>1</sup>, Fengyi Hu<sup>2</sup>, Wen Wang<sup>3,4\*</sup>, Shanlin Liu<sup>1,5\*</sup>

6

7 1. GrandOmic Biosciences, Beijing, 102200, China

8 2. State Key laboratory for Conservation and Utilization of Bio-Resources in Yunnan, Research Center for  
9 Perennial Rice Engineering and Technology of Yunnan, School of Agriculture, Yunnan University, Kunming,  
10 Yunnan, 650091, China

11 3. State Key Laboratory of Genetic Resources and Evolution, Kunming Institute of Zoology, Chinese Academy  
12 of Sciences, 650223 Kunming, Yunnan, China.

13 4. Center for Ecological and Environmental Sciences, Key Laboratory for Space Bioscience & Biotechnology,  
14 Northwestern Polytechnical University, 710072 Xi'an, China.

15 5. Department of Entomology, College of Plant Protection, China Agricultural University, 100193 Beijing, China

16 #Contribute equally

17 \*Correspondence to Shanlin Liu: [liushanlin@grandomics.com](mailto:liushanlin@grandomics.com) & Wen Wang: [wwang@mail.kiz.ac.cn](mailto:wwang@mail.kiz.ac.cn)

18

19

20

21 **Abstract**

22

23 The availability of reference genomes has revolutionized the study of biology. Multiple  
24 competing technologies have been developed to improve the quality and robustness of  
25 genome assemblies during the last decade. The two widely-used long-read sequencing  
26 providers – Pacbio (PB) and Oxford Nanopore Technologies (ONT) – have recently  
27 updated their platforms: PB enables high throughput HiFi reads with base-level  
28 resolution with > 99% and ONT generated reads as long as 2 Mb. We applied the two  
29 up-to-date platforms to one single rice individual and then compared the two assemblies  
30 to investigate the advantages and limitations of each. The results showed that ONT  
31 ultralong reads delivered higher contiguity producing a total of 18 contigs of which ten  
32 were assembled into a single chromosome compared to that of 394 contigs and three  
33 chromosome-level contigs for the PB assembly. The ONT ultralong reads also  
34 prevented assembly errors caused by long repetitive regions for which we observed a  
35 total of 44 genes of false redundancies and ten genes of false losses in the PB assembly  
36 leading to over/under-estimation of the gene families in those long repetitive regions.  
37 We also noted that the PB HiFi reads generated assemblies with considerably fewer  
38 errors at the level of single nucleotide and small InDels than that of the ONT assembly  
39 which generated an average 1.06 errors per kb and finally engendered 1,475 incorrect  
40 gene annotations via altered or truncated protein predictions.

41

42 **Key words:** assembly comparison, ONT ultralong, PB HiFi, CCS, single-molecular  
43 sequencer, contiguity

44

## 45 Findings

46

47 The availability of reference genomes has revolutionized the study of biology. The high  
48 quality human reference genome enabled the identification of disease causative alleles  
49 [1,2]; the genomes of agricultural crops have tremendously accelerated our  
50 understanding of how artificial selection shaped plant traits and how, in turn, these plant  
51 traits may influence species interactions, e.g. phytophagous insects, in agriculture [3,4].  
52 During the last decade, multiple competing technologies have been developed to  
53 improve the quality and robustness of genome assemblies [5–8], enabling genome  
54 reference collecting of the tree of life [9–11]. To date, a large number of genomes have  
55 been assembled by Third Generation Sequencing (TGS) technologies which can  
56 produce individual reads in the range of 10~100 kb or even longer [12–15]. Although  
57 the long-read methods still have a high error rate, they have been improving owing to  
58 the advances in sequencing chemistry and computational tools. For example, the Pacbio  
59 (PB) Single-molecule real-time (SMRT) sequencing platform released the Sequel II  
60 system. The updated SMRT cell enabled high throughput HiFi reads using the circular  
61 consensus sequencing (CCS) mode to provide base-level resolution with > 99% single-  
62 molecule read accuracy [16]; while the Oxford Nanopore Technologies (ONT)  
63 launched its PromethION platform which can yield > 7 Tb per run and its ultralong  
64 sequencing application facilitates the achievement of complete genome - Telomere to  
65 Telomere (T2T) - by resolving long and complex repetitive regions for various species  
66 including *Homo sapiens* [17]. The two cutting edge sequencing technologies have  
67 enabled the sequencing of many species; however, almost all chose one single  
68 sequencing system, either the PB or the ONT platform, to obtain their reference  
69 genomes [15,18,19]. Here we present one rice individual (*Oryza sativa* ssp. *indica*,  $2n$   
70  $= 2x = 24$ , variety 9311) [20,21] that was sequenced and assembled independently using  
71 the two up-to-date systems, and we compare the two assemblies to investigate the  
72 advantages and limitations of each.

73



## 74 Findings

75 Following DNA extraction from the rice sample, we sequenced the two extracts using  
76 ONT PromethION and PB Sequel II platforms, respectively. The PromethION  
77 generated a total of 92 Gb data (230X) with an N50 of 41,473 bp, and the Sequel II  
78 produced a total of 253 Gb data (632X) with each molecular fragment being sequenced  
79 14.72 times on average and produced ca. 20 Gb HiFi reads (50X) with an average length  
80 of 13,363 bp. We applied multiple software, including Canu1.9 [22], NextDenovo2.0-  
81 beta.1 (<https://github.com/Nextomics/NextDenovo>), WTDBG2.5 [23], Flye2.7.1 [24],  
82 SHASTA-0.4.0 [25] and NECAT (<https://github.com/xiaochuanle/NECAT>) to  
83 assemble the rice genome for both the ONT and PB dataset (Table S1), and then  
84 selected the optimal assembly for each sequencing platform based on contig N50 (Table  
85 S2). The ONT assembly showed higher contiguity with a contig number of 18 and an  
86 N50 value of ca. 32 Mb in comparison to a contig number of 394 and N50 of 17 Mb  
87 for the PB assembly (Figure 1a). Ten and three out of the total 12 autosomes were  
88 assembled into a single contig in the ONT and PB assembly, respectively. We identified  
89 telomeres and centromeres for both assemblies and found that seven of them reached a  
90 T2T level assembly with no gaps and no Ns in between (Table S3). A genome  
91 completeness assessment using BUSCOv3.1.0 [26] finds both assemblies performed  
92 well with the ONT having a tiny improvement (98.62% vs 98.33%, Table S4). We  
93 mapped both assemblies to a high-quality rice (R498) genome reference [20] using  
94 Minimap2 [27]. Both assemblies showed good collinearity (Figure S1) and the PB  
95 assembly contained more gaps compared to that of ONT (Figure 1a).

96  
97 We then randomly took one chromosome (Chr. 6) where ONT's one single contig  
98 (32,367,127 bp) corresponded to nine contigs (32,476,323 bp) of the PB assembly to  
99 investigate and visualize the incongruencies between them. For the nine contigs of PB  
100 assembled for the Chr. 6, four reached a length  $\geq$  6 Mb and five had a length of merely  
101 10-70 kb. We investigated the three gaps where the top four PB contigs (named as PB-  
102 L1, PB-L2, PB-L3 and PB-L4 from 5' to 3' end, respectively) failed to connect (Figure  
103 1b). We mapped the ONT ultralong reads to those gaps and confirmed their correctness

104 through manual inspections by IGV plot [28](Figure S2). The gap #1 between PB-L1  
105 and PB-L2 reached a length of 74,888 bp. One of the short PB contigs (PB-S1, length  
106 of 70,208 bp) had an overlap of ~10 kb with the 3' end of PB-L1, thus left the gap #1 a  
107 region of 15,722 bp that PB failed to cover (Figure 1c). We further examined the  
108 sequences obtained by ONT in and flanking this gap. It showed that the overlapping  
109 and the gap regions represented two elements of 15 kb and 48 kb in length that, although  
110 have only one copy on Chr. 6, can find their duplications on Chr. 5 (Figure S3).  
111 Repetitive elements with such lengths go beyond the typical length generated by PB  
112 CCS, therefore the right path can hardly be disentangled from complicated string graphs  
113 [22,29]. The gap #2 between PB-L2 and PB-L3 characterized a region spanning up to  
114 48 kb on the ONT assembly and is flanked by two tandem repeats of 14 kb in length. It  
115 was spanned by multiple ONT long reads (Figure S2), so can be successfully connected  
116 by the ONT assembly. The last gap between PB-L3 and PB-L4 can be connected by  
117 one short PB contig (PB-S2, 25,292 bp), which had 9,469 and 2,621 bp overlaps with  
118 3' end of PB-L3 and 5' end of PB-L4, respectively. And it showed the same case as gap  
119 #2, containing three tandem duplicates of length 23 kb that failed to be connected by  
120 PB HiFi reads. We found a total of 107 kb redundancies and 15 kb gaps on Chr. 6 owing  
121 to PB's incorrect assembly, which corresponded to an excess of 13 annotated genes  
122 (Figure 2, Table S5). The genome-wide misassembled regions accumulated to a length  
123 of ~ 668 kb (534 kb redundancies and 134 kb gaps), hosting 54 annotated genes (44  
124 redundancies and 10 loss, Table S5). As PB assembly did not generate any single  
125 contigs that ONT broke into multiple segments, we cannot find a counter case for  
126 comparison. In addition, a down-sampling test showed that the ONT dataset, unlike the  
127 PB data, can produce genome assemblies of the same contiguity level using half or one-  
128 third of raw reads, corroborating the central role that ultralong reads played in  
129 assembling genome regions with long repeats (Figure S4 and Table S6). It is also worth  
130 noting that PB can run in long read mode [30], which, although can hardly generate  
131 reads as long as the ONT ultralong reads, can aid in connecting some of the gaps caused  
132 by long repeats. Besides, longer PB libraries with HiFi reads reaching 20 kb [31] would  
133 be conducive to assembly contiguity as well.

134

135 In addition to those gaps that PB failed to connect, we noticed that there were a bunch  
136 of small-scale mismatches ( $< 85$  bp) between the two assemblies. Firstly, we extracted  
137 the reciprocal matches  $\geq 1$  M between the two assemblies for comparison using  
138 QUAST [32]. Then, we mapped the PB HiFi reads to both genome assemblies to  
139 identify *SNVs/InDels* under the assumption that HiFi reads provide high-level single-  
140 base accuracy. It showed that the ONT assembly, although polished using 70X  
141 Illumina's shotgun reads, still contained a large number of errors. In total, we found  
142 210,993 single nucleotide errors and 211,517 InDels (Mean: 1.39 bp, Figure S5)  
143 accounting for an average number of 1.06 errors per kb. However, instead of scattering  
144 evenly on the assembly, those errors formed into clusters (Figure S6). A further  
145 investigation for those regions showed  $\sim 94\%$  of them have a shotgun read coverage  $\leq$   
146 5, which explains why the last polishing step failed to fix those errors (Figure S7a). As  
147 those regions were well covered by ONT long reads (Figure S7b), we examined the GC  
148 content and methylation profiles for them speculating that different methylation  
149 patterns in such regions may have reduced the base calling accuracies there. The results  
150 showed that those ONT error-enriched regions contained higher or lower GC content  
151 and significantly higher methylation level compared to other genome regions (Figure  
152 S8), hence providing a training set that includes information of modifications and  
153 sequence motifs of rice for the neural network basecalling tools could at some extent  
154 alleviate the error rate of the ONT assembly [33]. We also found that 7.48 % of those  
155 errors located on exons and affected  $\sim 2,415$  exons (1,475 genes) to translate correctly  
156 to amino acid sequences on the ONT genome assembly. Most of those affected genes  
157 have multiple paralogous copies on the genome (Figure S9), rather than being single-  
158 copy orthologs utilized in the BUSCO analysis, suggesting a limited performance of  
159 short-reads-based genome polishing methods for duplicated genes on the genome. In  
160 addition, we did note that the errors of HiFi reads may be enriched in sequences with  
161 particular characteristics, rather than completely random, for example, regions like  
162 simple sequence repeats and long homopolymers (Supplementary Methods, Figure S10)  
163 which may exacerbate the above error statistics for the ONT assembly. What's more,

164 QUAST also reported some mismatches > 85 bp between the two assemblies. A manual  
165 examination for several randomly-selected discrepancies on Chr. 6 showed that they  
166 were repeated regions incorrectly assembled using PB reads, or regions with high  
167 methylation level where ONT errors enriched (Supplementary Methods and Figure  
168 S11).

169

170 Instead of using the assemblies generated by two different methods (Canu versus  
171 NextDenovo), a further examination for the two sequencing techniques using the same  
172 assembly methods (Supplementary Methods) achieved similar results: all assemblers  
173 produced a more contiguous genome assembly but with a loss of accuracy using the  
174 ONT ultralong reads compared to that using the PB HiFi reads (Figure 3 and Figure  
175 S12).

176

177 In conclusion, our study investigated genome assembly qualities between the two up-  
178 to-date competing long read sequencing techniques - the PB's HiFi reads and the ONT's  
179 ultralong reads. It showed both techniques had their own merits with: (1) ONT ultralong  
180 reads delivered higher contiguity and prevented false redundancies caused by long  
181 repeats, which, in our case of the rice genome, assembled 10 out of the 12 autosomes  
182 into one single contig, and (2) PB HiFi reads produced fewer errors at the level of single  
183 nucleotide and small InDels and obtained more than 1,400 genes that incorrectly  
184 annotated in the ONT assembly due to its error-prone reads. However, the current study  
185 has several limitations, including, among others, (1) NextDenovo which generated the  
186 most contiguous assembly for the ONT is a newly developed assembler that has not  
187 been validated its performance on other species; (2) the rice which has a relatively small  
188 and simple genome cannot characterize the full spectrum of the strength and weakness  
189 of the two sequencing technologies. Genome studies, especially for those large and  
190 complex genomes, will shed more light on this matter. Therefore, we suggest that  
191 further genome reference constructions should leverage both techniques to lessen the  
192 impact of assembly errors and subsequent annotation mistakes rooted in each. There is

193 also an urgent demand for improved assembly and error correction algorithms to fulfill  
194 this task.

195

## 196 **Methods**

### 197 *Sample preparation and sequencing*

198 The DNA used for ONT and PB sequel II platform sequencing were isolated from leaf  
199 tissues using SDS method and Q13323kit (QIAGEN), respectively (Supplementary  
200 Methods). The ONT platform generated a total of 6,100,295 pass reads with an average  
201 quality of 8.99 within 20 hours, and the PB sequel II platform generated a total of  
202 21,986,306 subreads with each molecular fragment being sequenced 14.72 times on  
203 average within 30 hours. Then, the PB subreads converted to HiFi reads using ccs  
204 (<https://github.com/PacificBiosciences/ccs>) with default parameters. Additionally, we  
205 generated a total of 188,590,034 shotgun reads (~70X) using a strategy of pair-end 150  
206 bp (PE 150) on the MGISEQ-2000 platform.

207

### 208 *Genome assembly and polishing*

209 After the genome assembly (Table S1), we mapped the ONT raw reads and PB HiFi  
210 reads onto their corresponding genomes using Minimap2 [27] and conducted genome  
211 polishing using RACON (Racon, RRID:SCR\_017642) [34] through three iterations. Then,  
212 for the ONT assembly we applied Medaka, a tool designed for ONT error correction,  
213 to conduct genome polishing once more. After that, NextPolish1.1.0 [35] was applied  
214 to fix small-scale errors (SNVs and InDels) for the ONT assembly using shotgun reads.  
215 We did not apply the shotgun-read-based polishing step to the PB assembly, since HiFi  
216 reads of PB platform have already reached an accurate rate of 99% as high as that of  
217 the shotgun reads. Finally, ONT assembly generated by NextDenovo and PB assembly  
218 generated by Canu (Canu, RRID:SCR\_015880) were selected out based on N50 value  
219 (Table S2) and used for the following comparison analyses.

220

### 221 *Identification for Centromeres and Telomeres*

222 We identified centromere and telomere-related sequences using the RCS2 family  
223 repeats and 5'-AAACCCT-3' repeats, respectively [20,36]. For centromeres, we first  
224 aligned the sequences of RCS2 family (AF058902.1) onto both the ONT and PB  
225 assemblies using BWA-MEM (BWA, RRID:SCR\_010910) [37], and regions that  
226 contained full units of RCS2 family were identified as centromeres. Telomeres were  
227 identified by searching for 5'-AAACCCT-3' repeats on each contig using Tandem  
228 Repeats Finder with default parameters [38].

229

### 230 *Assembly comparison*

231 **Collinearity:** We aligned both assemblies to a high-quality rice genome (variety R498,  
232 Accession ID: GCA\_002151415.1) using minimap2 [27] with a parameter setting of -  
233 x asm5. Then, we visualized the collinearity between the reference and query genomes  
234 using dotPlotly (<https://github.com/tpoorten/dotPlotly>, -t, -l, -m 30000, -q 1000000).

235 **Gap identification:** We aligned the PB assembly onto the ONT assembly using  
236 minimap2 [27] (-x asm5) and kept the primary hit for each contig. Then, we examined  
237 the alignment boundaries for each contig and identified the corresponding gap positions  
238 for each contig.

239 **Identification of mismatches between ONT and PB assembly:** we extracted the  
240 reciprocal matches  $\geq 1$  M between the two assemblies for comparison using QUAST  
241 5.0.2 (QUAST, RRID:SCR\_001228) with default parameters [32]. QUAST categorized  
242 mismatches into two different types: local mismatches  $> 85$  bp and small-scale  
243 mismatches including SNVs and small InDels.

244 **Identification of errors in forms of single nucleotide and small Indels:** We aligned  
245 PB HiFi reads onto the ONT assembly and then identified SNPs and InDels using  
246 GATK4 (GATK, RRID:SCR\_001876) [39] with filtering parameters:  $QD < 2.0 \parallel MQ <$   
247  $40.0 \parallel FS > 60.0 \parallel SOR > 3.0 \parallel MQRankSum < -12.5 \parallel ReadPosRankSum < -8.0$  for  
248 SNPs, and  $QD < 2.0 \parallel FS > 200.0 \parallel SOR > 10.0 \parallel MQRankSum < -12.5 \parallel$   
249  $ReadPosRankSum < -8.0$  for InDels. Given that both the PB and ONT assembly contain  
250 one set of the paired chromosomes and the discrepancies between them can present the  
251 heterozygous sites in the genome, we removed those that were identified to be

252 heterozygous, and regarded those homozygous derived alleles (1/1) as ONT errors.

253 **Gene loss and redundancies:** In the case that multiple PB assembly contigs mapped  
254 onto the same regions of the ONT assembly, we defined the relatively shorter ones as  
255 redundancies conditional on the following two criteria: (1) have a similarity score  $\geq 97\%$   
256 between each other; (2) have a total depth  $< 60$  and both have depths  $< 40$  (Figure 2a).  
257 In addition, the gaps (showed in Figure 1) failed to be covered or covered twice by the  
258 PB contigs were defined as losses and redundancies, respectively (Figure 2b). Finally,  
259 those regions that contained genes contributed to the final gene loss and redundancy  
260 statistics.

261 **Incorrect translation caused by ONT errors:** Firstly, we searched for ONT errors that  
262 located on exons based on gene annotations of both the ONT and PB assembly. For the  
263 exon inconsistencies between the two assemblies (present/absent and mismatches), we  
264 aligned amino acid sequences of the PB assembly onto corresponding ONT regions  
265 using exonerate [40] (--model protein2genome --refine full -n 1) to investigate how the  
266 ONT errors affected gene translation.

267

#### 268 *DNA methylation*

269 We calculated the genome-wide methylation level for the ONT assembly using  
270 Nanopolish v0.11.1 (Nanopolish, RRID:SCR\_016157) with called\_sites  $\geq 10$ . The  
271 methylation profiles and GC content were recorded throughout the genome with a  
272 window size of 1,000 bp and a step length of 500 bp. Windows that contains  $\geq 5$  ONT  
273 errors were defined as ONT error-enriched regions and were utilized to compare for the  
274 methylation and GC content with other genomic regions.

## 275 **Availability of data and materials**

276 The raw reads, the genome assemblies of PB (assembled using Canu1.9) and ONT  
277 (assembled using NextDenovo) are deposited on NCBI under the project ID  
278 PRJNA600693, PRJNA644721 and PRJNA644720, respectively.

279 Supporting data, including annotation files, assemblies and BUSCO results, are also  
280 available via the *GigaScience* database, GigaDB [41]

281

## 282 **Competing interests**

283 The authors declare that they have no competing interests.

284

## 285 **References**

- 286 1. Weischenfeldt J, Symmons O, Spitz F, Korbel JO. Phenotypic impact of genomic  
287 structural variation: insights from and for human disease. *Nat Rev Genet.* 2013;14:125–  
288 38.
- 289 2. Fujimoto A, Furuta M, Totoki Y, Tsunoda T, Kato M, Shiraishi Y, et al. Whole-  
290 genome mutational landscape and characterization of noncoding and structural  
291 mutations in liver cancer. *Nat Genet.* 2016;48:500.
- 292 3. Saxena RK, Edwards D, Varshney RK. Structural variations in plant genomes. *Brief*  
293 *Funct Genomics.* 2014;13:296–307.
- 294 4. Chen YH, Gols R, Benrey B. Crop domestication and its impact on naturally selected  
295 trophic interactions. *Annu Rev Entomol.* 2015;60:35–58.
- 296 5. Wheeler DA, Srinivasan M, Egholm M, Shen Y, Chen L, McGuire A, et al. The  
297 complete genome of an individual by massively parallel DNA sequencing. *Nature.*  
298 2008;452:872–6.
- 299 6. Bentley DR, Balasubramanian S, Swerdlow HP, Smith GP, Milton J, Brown CG, et  
300 al. Accurate whole human genome sequencing using reversible terminator chemistry.  
301 *Nature.* 2008;456:53–9.
- 302 7. Pushkarev D, Neff NF, Quake SR. Single-molecule sequencing of an individual  
303 human genome. *Nat Biotechnol.* 2009;27:847.
- 304 8. Rothberg JM, Hinz W, Rearick TM, Schultz J, Mileski W, Davey M, et al. An  
305 integrated semiconductor device enabling non-optical genome sequencing. *Nature.*  
306 2011;475:348–52.
- 307 9. Seberg O, Droege G, Barker K, Coddington JA, Funk V, Gostel M, et al. Global  
308 Genome Biodiversity Network: saving a blueprint of the Tree of Life—a botanical  
309 perspective. *Ann Bot.* 2016;118:393–9.
- 310 10. Mukherjee S, Seshadri R, Varghese NJ, Eloë-Fadrosh EA, Meier-Kolthoff JP,  
311 Göker M, et al. 1,003 reference genomes of bacterial and archaeal isolates expand



312 coverage of the tree of life. *Nat Biotechnol.* 2017;35:676.

313 11. Lewin HA, Robinson GE, Kress WJ, Baker WJ, Coddington J, Crandall KA, et al.  
314 Earth BioGenome Project: sequencing life for the future of life. *Proc Natl Acad Sci.*  
315 2018;115:4325–33.

316 12. Chaisson MJP, Huddleston J, Dennis MY, Sudmant PH, Malig M, Hormozdiari F,  
317 et al. Resolving the complexity of the human genome using single-molecule sequencing.  
318 *Nature.* 2015;517:608–11.

319 13. VanBuren R, Bryant D, Edger PP, Tang H, Burgess D, Challabathula D, et al.  
320 Single-molecule sequencing of the desiccation-tolerant grass *Oropetium thomaeum*.  
321 *Nature.* 2015;527:508–11.

322 14. Gordon D, Huddleston J, Chaisson MJP, Hill CM, Kronenberg ZN, Munson KM,  
323 et al. Long-read sequence assembly of the gorilla genome. *Science.* 2016;352:aae0344.

324 15. Jiao Y, Peluso P, Shi J, Liang T, Stitzer MC, Wang B, et al. Improved maize  
325 reference genome with single-molecule technologies. *Nature.* 2017;546:524–7.

326 16. Wenger AM, Peluso P, Rowell WJ, Chang P-C, Hall RJ, Concepcion GT, et al.  
327 Accurate circular consensus long-read sequencing improves variant detection and  
328 assembly of a human genome. *Nat Biotechnol.* 2019;37:1155–62.

329 17. Miga KH, Koren S, Rhie A, Vollger MR, Gershman A, Bzikadze A, et al. Telomere-  
330 to-telomere assembly of a complete human X chromosome. *bioRxiv.* 2019;735928.

331 18. Loman NJ, Quick J, Simpson JT. A complete bacterial genome assembled *de novo*  
332 using only nanopore sequencing data. *Nat Methods.* 2015;12:733–5.

333 19. Jain M, Koren S, Miga KH, Quick J, Rand AC, Sasani TA, et al. Nanopore  
334 sequencing and assembly of a human genome with ultra-long reads. *Nat Biotechnol.*  
335 2018;36:338.

336 20. Du H, Yu Y, Ma Y, Gao Q, Cao Y, Chen Z, et al. Sequencing and *de novo* assembly  
337 of a near complete *indica* rice genome. *Nat Commun.* 2017;8.

338 21. Yu J, Wang J, Lin W, Li S, Li H, Zhou J, et al. The genomes of *Oryza sativa*: a  
339 history of duplications. *PLoS Biol.* 2005;3.

340 22. Koren S, Walenz BP, Berlin K, Miller JR, Bergman NH, Phillippy AM. Canu:  
341 scalable and accurate long-read assembly via adaptive k-mer weighting and repeat  
342 separation. *Genome Res.* 2017;27:722–36.

343 23. Ruan J, Li H. Fast and accurate long-read assembly with wtdbg2. *Nat Methods.*  
344 2020;17:155–8.

345 24. Kolmogorov M, Yuan J, Lin Y, Pevzner PA. Assembly of long, error-prone reads  
346 using repeat graphs. *Nat Biotechnol.* 2019;37:540–6.

347 25. Shafin K, Pesout T, Lorig-Roach R, Haukness M, Olsen HE, Bosworth C, et al.  
348 Nanopore sequencing and the Shasta toolkit enable efficient *de novo* assembly of eleven  
349 human genomes. *Nat Biotechnol.* 2020;1–10.

350 26. Seppey M, Manni M, Zdobnov EM. BUSCO: assessing genome assembly and  
351 annotation completeness. *Gene Predict.* 2019;227–45.

352 27. Li H. Minimap2: pairwise alignment for nucleotide sequences. *Bioinformatics.*  
353 2018;34:3094–100.

354 28. Robinson JT, Thorvaldsdóttir H, Winckler W, Guttman M, Lander ES, Getz G, et  
355 al. Integrative genomics viewer. *Nat Biotechnol.* 2011;29:24–6.

356 29. Myers EW. The fragment assembly string graph. *Bioinformatics*. 2005;21:79–85.  
357 30. Rhoads A, Au KF. PacBio sequencing and its applications. *GPB*. 2015;13:278–89.  
358 31. Nurk S, Walenz BP, Rhie A, Vollger MR, Logsdon GA, Grothe R, et al. HiCanu:  
359 accurate assembly of segmental duplications, satellites, and allelic variants from high-  
360 fidelity long reads. *bioRxiv*. 2020.  
361 32. Mikheenko A, Prjibelski A, Saveliev V, Antipov D, Gurevich A. Versatile genome  
362 assembly evaluation with QUAST-LG. *Bioinformatics*. 2018;34:i142–50.  
363 33. Wick RR, Judd LM, Holt KE. Performance of neural network basecalling tools for  
364 Oxford Nanopore sequencing. *Genome Biol*. 2019;20:129.  
365 34. Vaser R, Sović I, Nagarajan N, Šikić M. Fast and accurate *de novo* genome  
366 assembly from long uncorrected reads. *Genome Res*. 2017;27:737–46.  
367 35. Hu J, Fan J, Sun Z, Liu S. NextPolish: a fast and efficient genome polishing tool  
368 for long read assembly. *Bioinformatics*. 2019.  
369 36. Dong F, Miller JT, Jackson SA, Wang G-L, Ronald PC, Jiang J. Rice (*Oryza sativa*)  
370 centromeric regions consist of complex DNA. *Proc Natl Acad Sci*. 1998;95:8135–40.  
371 37. Li H, Durbin R. Fast and accurate short read alignment with Burrows–Wheeler  
372 transform. *Bioinformatics*. 2009;25:1754–60.  
373 38. Benson G. Tandem repeats finder: a program to analyze DNA sequences. *Nucleic*  
374 *Acids Res*. 1999;27:573–80.  
375 39. McKenna A, Hanna M, Banks E, Sivachenko A, Cibulskis K, Kernytsky A, et al.  
376 The Genome Analysis Toolkit: a MapReduce framework for analyzing next-generation  
377 DNA sequencing data. *Genome Res*. 2010;20:1297–303.  
378 40. Slater GSC, Birney E. Automated generation of heuristics for biological sequence  
379 comparison. *BMC Bioinformatics*. 2005;6:31.  
380 41 Lang D, Zhang S, Ren P, Liang F, Sun Z, Meng G, et al. Supporting data for  
381 "Comparison of the two up-to-date sequencing technologies for genome assembly: HiFi  
382 reads of Pacbio Sequel II system and ultralong reads of Oxford Nanopore" *GigaScience*  
383 *Database* 2020. <http://dx.doi.org/10.5524/100805>  
384  
385

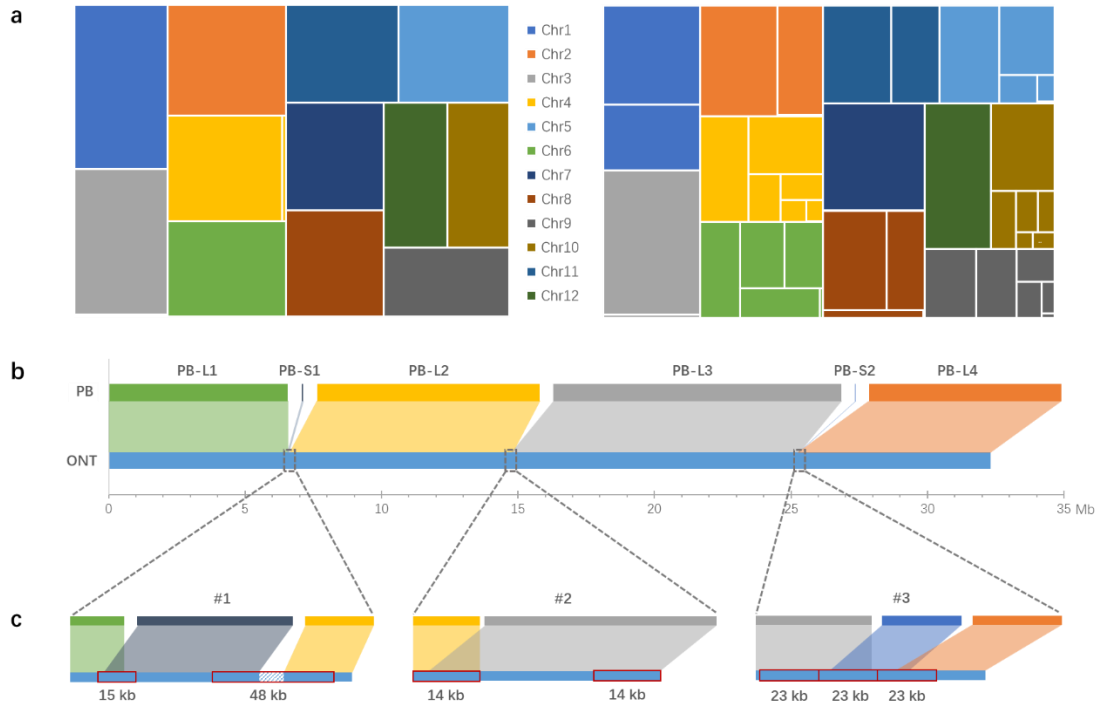

**Figure 1. Contiguity of the ONT and PB assemblies.** (a) Treemaps for contig length difference between the ONT (left) and PB (right) assembly; (b) The six PB contigs mapped to one ONT contig corresponding to Chr. 6; (c) Details of the three PB gaps. Red rectangles noted the repeat elements.

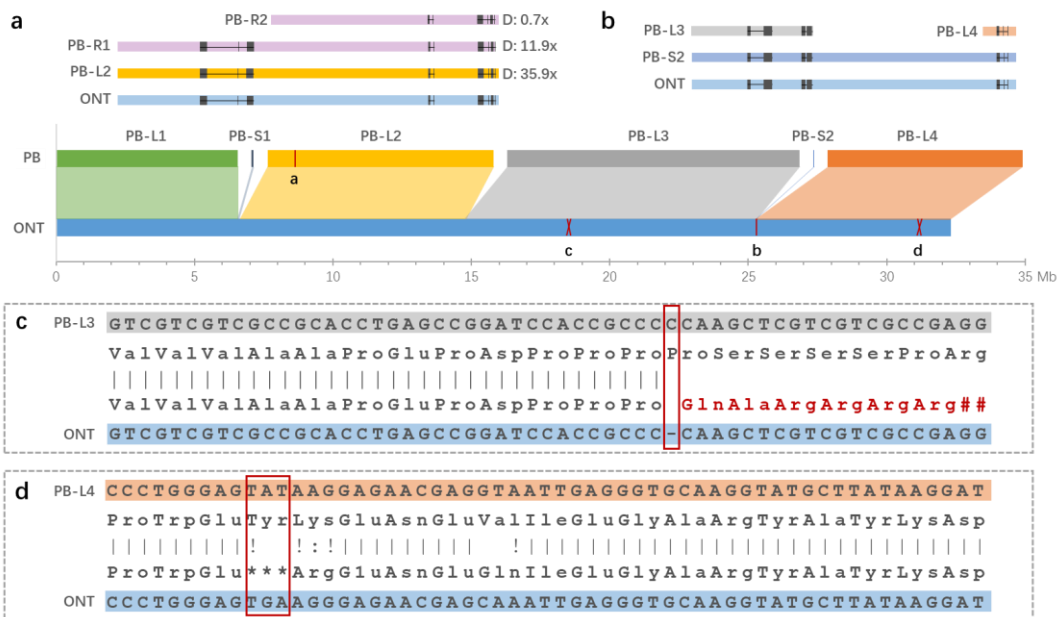

**Figure 2. Assembly errors in which genes can be annotated.** (a) An example shows gene gains that caused by assembly redundancies, of which the PB-R1 and PB-R2 had a similarity level of 99.67% and 99.51%, respectively, compared to the corresponding region on PB-L2, and “D” abbreviates from depth; (b) The gene redundancies caused by gaps that failed to be correctly connected by the PB assembly; (c) An example shows a 1-base deletion led to frameshift mistake for protein translation; (d) An example shows single base error led to stop codon gain and truncated protein translation.

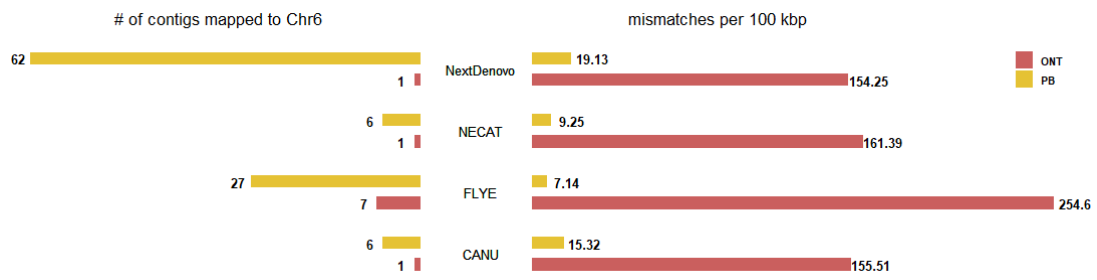

**Figure 3. Assembly comparisons using the same methods.** Left: number of contigs that were mapped onto Chr. 6; Right: number of mismatches (including SNVs and InDels) per 100 kb.

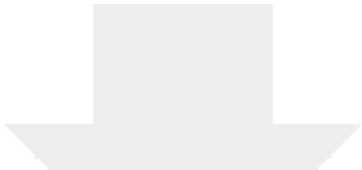

Click here to access/download  
**Supplementary Material**  
Figure 1.svg





Click here to access/download  
**Supplementary Material**  
Figure 2.svg



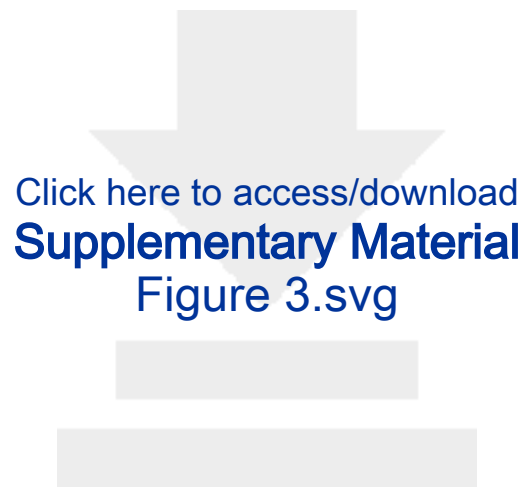



Click here to access/download  
**Supplementary Material**  
Figure S1.pdf





Click here to access/download  
**Supplementary Material**  
Figure S2.svg



Click here to access/download  
**Supplementary Material**  
Figure S3.pdf



Click here to access/download  
**Supplementary Material**  
Figure S4.svg



Click here to access/download  
**Supplementary Material**  
Figure S5.pdf



Click here to access/download  
**Supplementary Material**  
Figure S6.svg



Click here to access/download  
**Supplementary Material**  
Figure S7.pdf



Click here to access/download  
**Supplementary Material**  
Figure S8.svg



Click here to access/download  
**Supplementary Material**  
Figure S9.pdf





Click here to access/download  
**Supplementary Material**  
Figure S10.pdf



Click here to access/download  
**Supplementary Material**  
Figure S11.pdf

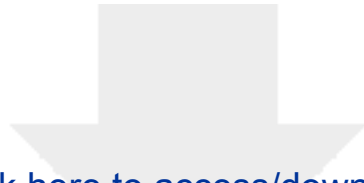

[Click here to access/download](#)

**Supplementary Material**

Supplementary information-20200818.docx

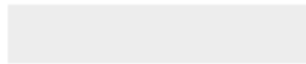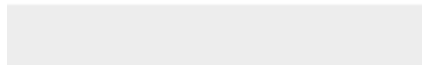



Click here to access/download  
**Supplementary Material**  
Figure S12.pdf





Click here to access/download  
**Supplementary Material**  
Figure S12.pdf



Supplement: giaa123_giga-d-20-00061_revision_2.pdf [file giaa123_giga-d-20-00061_revision_2.pdf]
